# Supplementary material
Source: PubMed Central journal article supplement (PMC7086288)

**Table S1** Cognitive Test Battery (Charlie)

| Domain                                | Measure                               | Description                                                                                                                                                                                                                                                                                                                                                                                               |
|---------------------------------------|---------------------------------------|-----------------------------------------------------------------------------------------------------------------------------------------------------------------------------------------------------------------------------------------------------------------------------------------------------------------------------------------------------------------------------------------------------------|
| General cognitive ability             | g                                     | First component of principal component analyses using all cognitive measures listed below.                                                                                                                                                                                                                                                                                                                |
| General verbal knowledge              | Wechsler Test of Adult Reading        | Subjects read aloud a list of 50 irregularly spelled words.                                                                                                                                                                                                                                                                                                                                               |
| Language                              | WASI Vocabulary                       | Subjects answer questions about the meaning of words (e.g., What does winter mean?).                                                                                                                                                                                                                                                                                                                      |
| Abstract reasoning                    | WASI Matrix                           | Subjects view an incomplete matrix and select the response that completes the matrix.                                                                                                                                                                                                                                                                                                                     |
| Verbal and semantic fluency           | Controlled Oral Word Association Test | Subjects list as many words as possible in 60 seconds. In the first three trials, the words must begin with the letters, F, A, and S (verbal fluency). In the fourth trial, the words must be animals (semantic fluency).                                                                                                                                                                                 |
| Processing speed & executive function | Trail-Making A & B                    | Subjects click on circles presented on the screen in a specified order. In Trail-Making A, the order is consecutive numbers, starting with 1. In Trail-Making B, the order is alternating numbers and letters.                                                                                                                                                                                            |
| Processing speed                      | Digit Symbol Coding Test              | A key of digit symbol pairs is presented at the top of the screen and subjects indicate whether a target digit symbol pair presented at the center of the screen matches any pair from the key. Subjects complete as many trials as possible in 90 seconds.                                                                                                                                               |
| Verbal memory                         | California Verbal Learning Test       | Subjects hear an audio recording of 16 words, and repeat out loud as many words as they can recall. This is repeated for five trials (learning condition). On the sixth trial (recall condition), subjects list as many words as they can recall without first hearing the audio recording. In the recognition condition, subjects recognize the 16 target words presented alongside 32 non-target words. |
| Working memory                        | Span forward & backward               | Subjects hear sequences of letters or numbers that increase in length throughout the trials and repeat these sequences out loud. In the forward condition, subjects repeat the sequences in the order in which they heard them. In the backward condition, subjects repeat the sequences in reverse order.                                                                                                |
|                                       | Letter number sequencing              | Same as above, but the sequences contain both letters and numbers and subjects repeat the letters in numerical order, followed by the letters in alphabetical order.                                                                                                                                                                                                                                      |

**Figure S1** Correlations between all cognitive measures and age

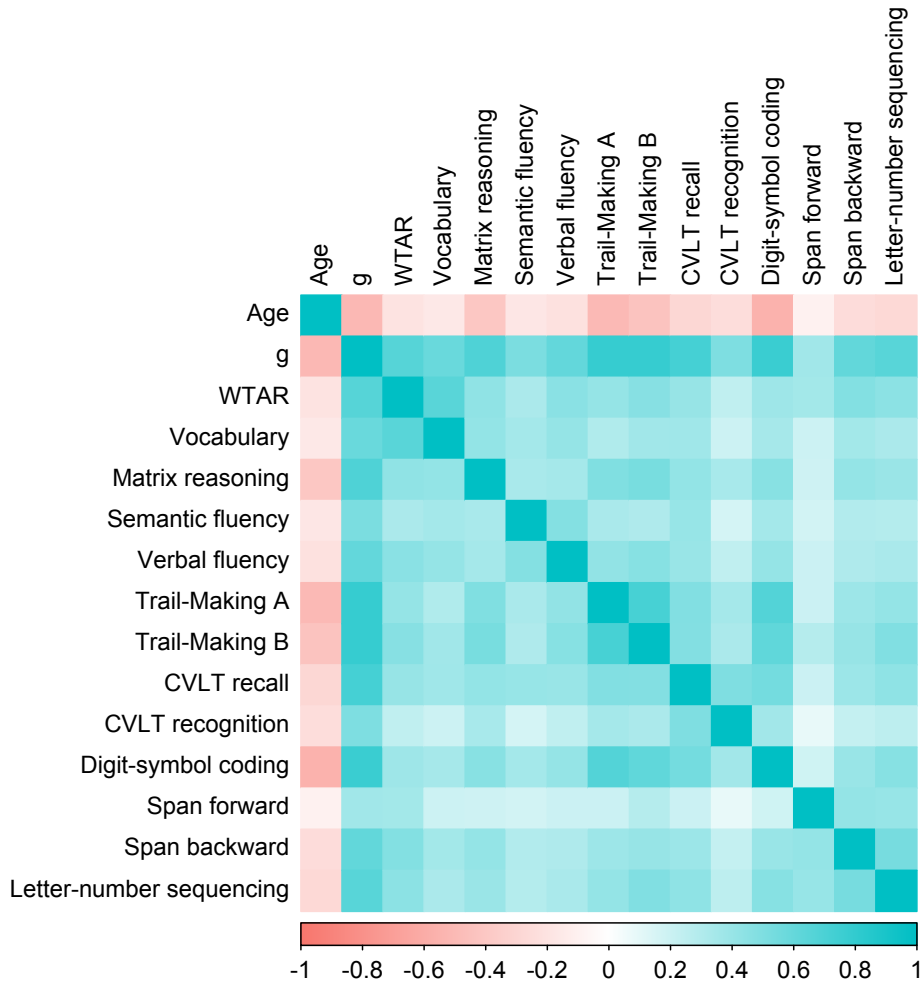

**Figure S2** *g* charts for all groups

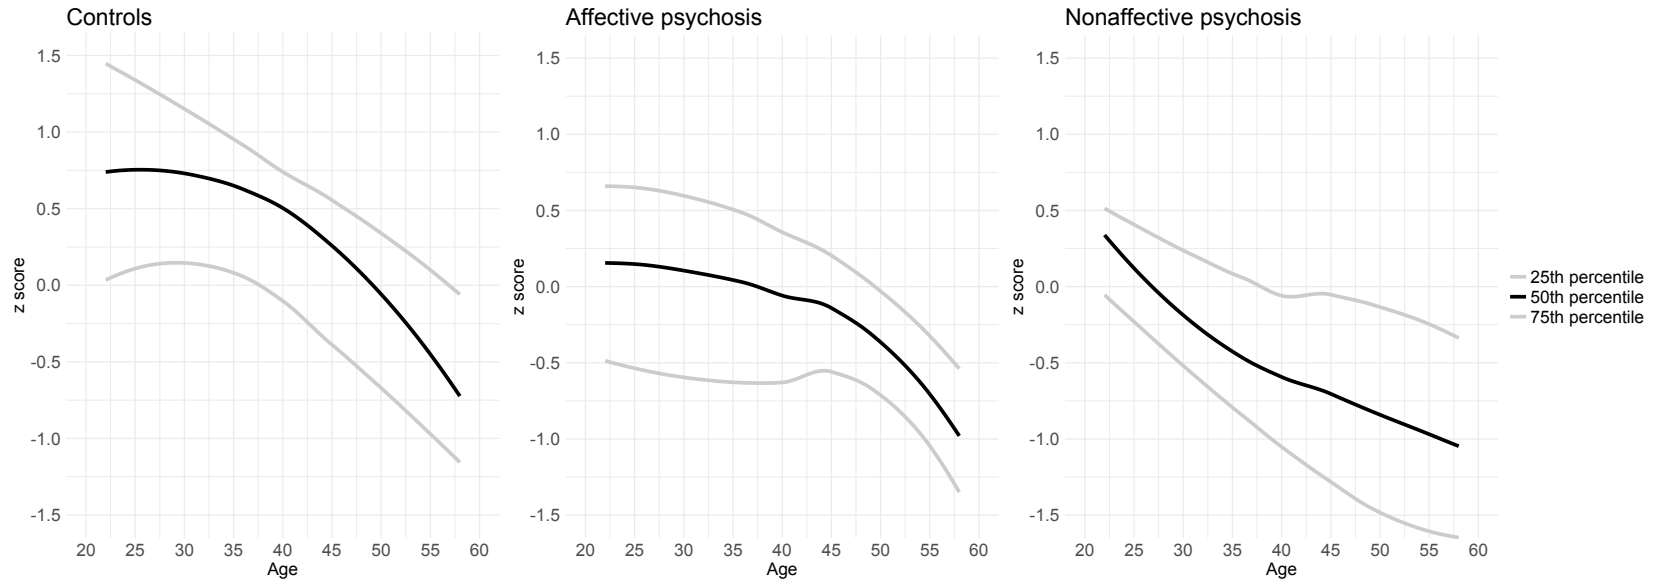

**Figure S3** Cognitive charts for control, affective psychosis and nonaffective psychosis groups with local regression smoothing

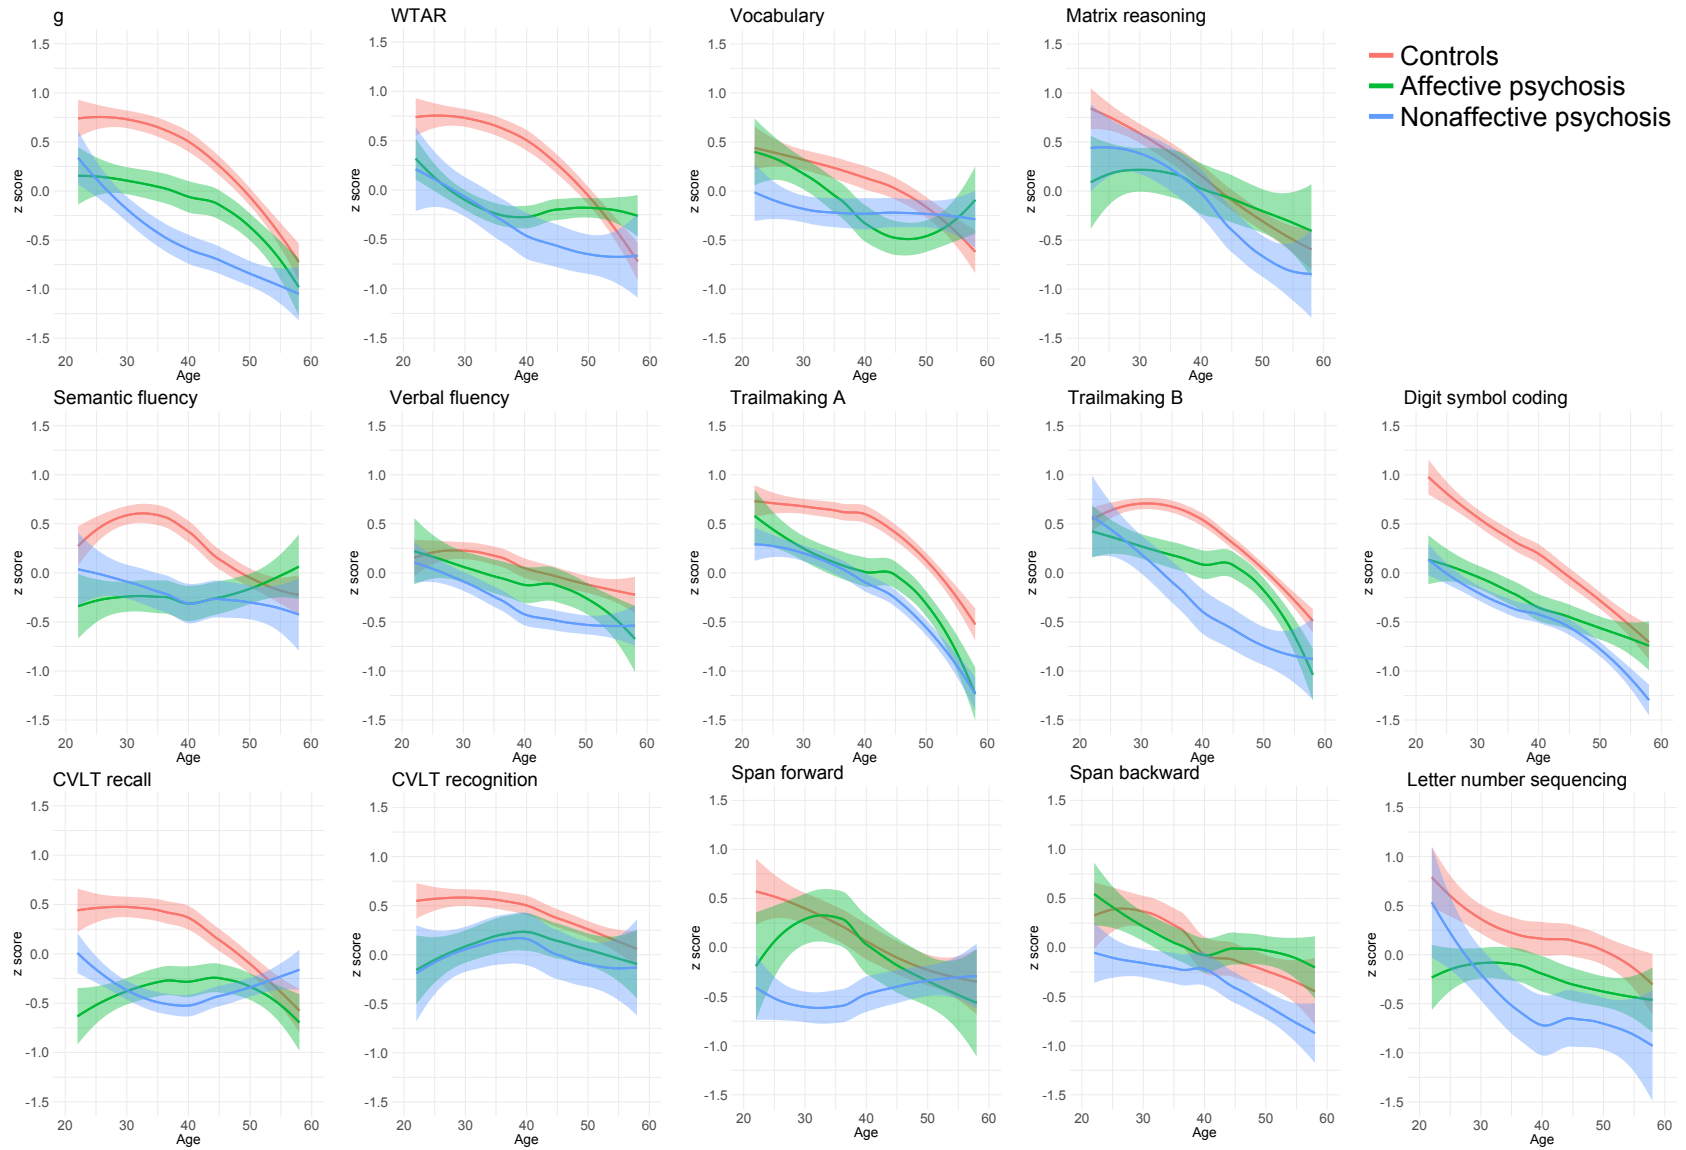

**Table S2** Fit indices of alternative statistical models\*

| Statistical model                                     | AIC         | BIC         |
|-------------------------------------------------------|-------------|-------------|
| Age as a linear function                              | 36.1        | 55.1        |
| <b>Age as a natural cubic spline with three knots</b> | <b>15.7</b> | <b>42.8</b> |
| Age as a natural cubic spline with four knots         | 16.8        | 52.0        |
| No age-by-group interaction                           | 31.4        | 47.6        |

AIC: Akaike information criterion; BIC: Bayesian information criterion

\*Boded model indicates model with best fit

**Table S3** Group and group-by-age interaction effects of regression analyses adjusting for sex and antipsychotic medication

| Cognitive measure        | Affective psychosis    |                  |                  |                                             |                  |                  |                                              |                  |                  |
|--------------------------|------------------------|------------------|------------------|---------------------------------------------|------------------|------------------|----------------------------------------------|------------------|------------------|
|                          | Group effect           |                  |                  | Group-by-age interaction<br>Early adulthood |                  |                  | Group-by-age interaction<br>Middle adulthood |                  |                  |
|                          | $\beta$                | $p$              | $p^{FDR}$        | $\beta$                                     | $p$              | $p^{FDR}$        | $\beta$                                      | $p$              | $p^{FDR}$        |
| g                        | <b>-0.21</b>           | <b>0.002</b>     | <b>0.013</b>     | 0.49                                        | 0.182            | 0.364            | <b>0.63</b>                                  | <b>0.002</b>     | <b>0.006</b>     |
| WTAR                     | <b>-0.17</b>           | <b>0.015</b>     | <b>0.035</b>     | 0.43                                        | 0.285            | 0.423            | <b>0.77</b>                                  | <b>0.001</b>     | <b>0.003</b>     |
| Vocabulary               | -0.04                  | 0.539            | 0.539            | -0.76                                       | 0.056            | 0.130            | <b>0.51</b>                                  | <b>0.019</b>     | <b>0.043</b>     |
| Matrix reasoning         | 0.08                   | 0.395            | 0.425            | <b>1.26</b>                                 | <b>0.021</b>     | 0.114            | 0.57                                         | 0.056            | 0.111            |
| Semantic fluency         | <b>-0.16</b>           | <b>0.042</b>     | 0.059            | <b>0.93</b>                                 | <b>0.033</b>     | 0.114            | <b>1.17</b>                                  | <b>&lt;0.001</b> | <b>&lt;0.001</b> |
| Verbal fluency           | <b>0.16</b>            | <b>0.004</b>     | <b>0.014</b>     | -0.27                                       | 0.423            | 0.494            | -0.14                                        | 0.459            | 0.536            |
| Trail-Making A           | <b>-0.11</b>           | <b>0.021</b>     | <b>0.042</b>     | -0.31                                       | 0.302            | 0.423            | -0.20                                        | 0.224            | 0.285            |
| Trail-Making B           | <b>-0.15</b>           | <b>0.042</b>     | 0.059            | 0.35                                        | 0.371            | 0.472            | 0.27                                         | 0.209            | 0.285            |
| Digit symbol coding      | <b>-0.16</b>           | <b>0.003</b>     | <b>0.013</b>     | 0.07                                        | 0.803            | 0.803            | <b>0.67</b>                                  | <b>&lt;0.001</b> | <b>&lt;0.001</b> |
| CVLT recall              | <b>-0.18</b>           | <b>0.012</b>     | <b>0.035</b>     | <b>1.81</b>                                 | <b>&lt;0.001</b> | <b>&lt;0.001</b> | <b>0.61</b>                                  | <b>0.002</b>     | <b>0.005</b>     |
| CVLT recognition         | -0.11                  | 0.137            | 0.174            | <b>1.00</b>                                 | <b>0.026</b>     | 0.114            | 0.42                                         | 0.088            | 0.137            |
| Span forward             | 0.10                   | 0.333            | 0.389            | 0.71                                        | 0.216            | 0.379            | -0.03                                        | 0.921            | 0.921            |
| Span backward            | <b>0.22</b>            | <b>0.003</b>     | <b>0.013</b>     | 0.16                                        | 0.711            | 0.765            | 0.43                                         | 0.078            | 0.136            |
| Letter number sequencing | <b>-0.21</b>           | <b>0.029</b>     | 0.051            | 1.08                                        | 0.054            | 0.130            | 0.16                                         | 0.607            | 0.654            |
| Cognitive measure        | Nonaffective psychosis |                  |                  |                                             |                  |                  |                                              |                  |                  |
|                          | Group effect           |                  |                  | Group-by-age interaction<br>Early adulthood |                  |                  | Group-by-age interaction<br>Middle adulthood |                  |                  |
|                          | $\beta$                | $p$              | $p^{FDR}$        | $\beta$                                     | $p$              | $p^{FDR}$        | $\beta$                                      | $p$              | $p^{FDR}$        |
| g                        | <b>-0.35</b>           | <b>&lt;0.001</b> | <b>&lt;0.001</b> | <b>-0.99</b>                                | <b>0.007</b>     | 0.052            | <b>0.49</b>                                  | <b>0.015</b>     | 0.050            |
| WTAR                     | <b>-0.38</b>           | <b>&lt;0.001</b> | <b>&lt;0.001</b> | -0.23                                       | 0.573            | 0.730            | 0.17                                         | 0.426            | 0.542            |
| Vocabulary               | -0.10                  | 0.143            | 0.167            | 0.65                                        | 0.103            | 0.230            | <b>0.75</b>                                  | <b>0.001</b>     | <b>0.004</b>     |
| Matrix reasoning         | -0.14                  | 0.123            | 0.157            | 0.15                                        | 0.774            | 0.827            | -0.10                                        | 0.732            | 0.732            |
| Semantic fluency         | -0.13                  | 0.104            | 0.145            | 0.12                                        | 0.774            | 0.827            | <b>0.56</b>                                  | <b>0.018</b>     | 0.050            |
| Verbal fluency           | 0.00                   | 0.955            | 0.955            | -0.54                                       | 0.115            | 0.230            | -0.20                                        | 0.271            | 0.474            |
| Trail-Making A           | <b>-0.25</b>           | <b>&lt;0.001</b> | <b>&lt;0.001</b> | -0.37                                       | 0.220            | 0.386            | -0.31                                        | 0.060            | 0.139            |
| Trail-Making B           | <b>-0.32</b>           | <b>&lt;0.001</b> | <b>&lt;0.001</b> | <b>-1.58</b>                                | <b>&lt;0.001</b> | <b>0.002</b>     | -0.18                                        | 0.401            | 0.542            |
| Digit symbol coding      | <b>-0.20</b>           | <b>&lt;0.001</b> | <b>&lt;0.001</b> | 0.29                                        | 0.323            | 0.503            | 0.19                                         | 0.230            | 0.461            |
| CVLT recall              | <b>-0.18</b>           | <b>0.015</b>     | <b>0.024</b>     | 0.26                                        | 0.457            | 0.639            | <b>1.18</b>                                  | <b>&lt;0.001</b> | <b>&lt;0.001</b> |
| CVLT recognition         | <b>-0.20</b>           | <b>0.007</b>     | <b>0.014</b>     | <b>0.89</b>                                 | <b>0.047</b>     | 0.143            | 0.25                                         | 0.312            | 0.485            |
| Span forward             | <b>-0.25</b>           | <b>0.014</b>     | <b>0.024</b>     | <b>1.32</b>                                 | <b>0.022</b>     | 0.104            | <b>0.98</b>                                  | <b>0.002</b>     | <b>0.010</b>     |
| Span backward            | -0.08                  | 0.258            | 0.278            | 0.10                                        | 0.827            | 0.827            | 0.17                                         | 0.487            | 0.558            |
| Letter number sequencing | <b>-0.40</b>           | <b>&lt;0.001</b> | <b>&lt;0.001</b> | -1.10                                       | 0.051            | 0.143            | -0.20                                        | 0.518            | 0.558            |

Bolded estimates signify statistical significance ( $p < 0.05$ )

WTAR = Wechsler Test of Adult Reading

<sup>FDR</sup> Corrected for multiple testing (FDR = 0.05)

**Table S4** Group and group-by-age interaction effects of regression analyses adjusting for sex and cannabis use

| Cognitive measure        | Affective psychosis    |                  |                  |                                             |              |              |                                              |                  |                  |
|--------------------------|------------------------|------------------|------------------|---------------------------------------------|--------------|--------------|----------------------------------------------|------------------|------------------|
|                          | Group effect           |                  |                  | Group-by-age interaction<br>Early adulthood |              |              | Group-by-age interaction<br>Middle adulthood |                  |                  |
|                          | $\beta$                | $p$              | $p^{FDR}$        | $\beta$                                     | $p$          | $p^{FDR}$    | $\beta$                                      | $p$              | $p^{FDR}$        |
| g                        | <b>-0.50</b>           | <b>&lt;0.001</b> | <b>&lt;0.001</b> | 0.37                                        | 0.279        | 0.688        | <b>0.61</b>                                  | <b>0.001</b>     | <b>0.005</b>     |
| WTAR                     | -0.16                  | 0.054            | 0.095            | 0.43                                        | 0.355        | 0.711        | <b>0.95</b>                                  | <b>&lt;0.001</b> | <b>0.002</b>     |
| Vocabulary               | <b>-0.22</b>           | <b>0.004</b>     | <b>0.009</b>     | -0.57                                       | 0.160        | 0.688        | <b>0.65</b>                                  | <b>0.004</b>     | <b>0.011</b>     |
| Matrix reasoning         | -0.16                  | 0.110            | 0.171            | <b>1.29</b>                                 | <b>0.025</b> | 0.177        | 0.58                                         | 0.065            | 0.152            |
| Semantic fluency         | <b>-0.42</b>           | <b>&lt;0.001</b> | <b>&lt;0.001</b> | 0.48                                        | 0.295        | 0.688        | <b>1.07</b>                                  | <b>&lt;0.001</b> | <b>0.001</b>     |
| Verbal fluency           | <b>-0.22</b>           | <b>&lt;0.001</b> | <b>0.001</b>     | -0.18                                       | 0.624        | 0.991        | -0.01                                        | 0.975            | 0.975            |
| Trail-Making A           | 0.04                   | 0.665            | 0.748            | -0.01                                       | 0.984        | 0.991        | -0.08                                        | 0.806            | 0.887            |
| Trail-Making B           | <b>-0.32</b>           | <b>&lt;0.001</b> | <b>&lt;0.001</b> | 0.09                                        | 0.848        | 0.991        | 0.05                                         | 0.824            | 0.887            |
| Digit symbol coding      | <b>-0.45</b>           | <b>&lt;0.001</b> | <b>&lt;0.001</b> | <b>0.72</b>                                 | <b>0.014</b> | 0.177        | <b>0.52</b>                                  | <b>0.001</b>     | <b>0.005</b>     |
| CVLT recall              | 0.03                   | 0.670            | 0.748            | -0.03                                       | 0.957        | 0.991        | -0.18                                        | 0.521            | 0.802            |
| CVLT recognition         | -0.02                  | 0.814            | 0.814            | 0.15                                        | 0.778        | 0.991        | -0.11                                        | 0.720            | 0.887            |
| Span forward             | 0.04                   | 0.680            | 0.748            | -0.01                                       | 0.991        | 0.991        | -0.20                                        | 0.573            | 0.802            |
| Span backward            | 0.03                   | 0.695            | 0.748            | 0.13                                        | 0.804        | 0.991        | 0.17                                         | 0.561            | 0.802            |
| Letter number sequencing | <b>-0.47</b>           | <b>&lt;0.001</b> | <b>&lt;0.001</b> | 0.55                                        | 0.289        | 0.688        | 0.25                                         | 0.378            | 0.756            |
| Cognitive measure        | Nonaffective psychosis |                  |                  |                                             |              |              |                                              |                  |                  |
|                          | Group effect           |                  |                  | Group-by-age interaction<br>Early adulthood |              |              | Group-by-age interaction<br>Middle adulthood |                  |                  |
|                          | $\beta$                | $p$              | $p^{FDR}$        | $\beta$                                     | $p$          | $p^{FDR}$    | $\beta$                                      | $p$              | $p^{FDR}$        |
| g                        | <b>-0.74</b>           | <b>&lt;0.001</b> | <b>&lt;0.001</b> | <b>-0.75</b>                                | <b>0.031</b> | 0.213        | <b>0.82</b>                                  | <b>&lt;0.001</b> | <b>&lt;0.001</b> |
| WTAR                     | <b>-0.36</b>           | <b>&lt;0.001</b> | <b>&lt;0.001</b> | -0.51                                       | 0.276        | 0.553        | 0.12                                         | 0.631            | 0.747            |
| Vocabulary               | <b>-0.25</b>           | <b>0.001</b>     | <b>0.002</b>     | 0.67                                        | 0.099        | 0.277        | <b>1.03</b>                                  | <b>&lt;0.001</b> | <b>&lt;0.001</b> |
| Matrix reasoning         | <b>-0.28</b>           | <b>0.004</b>     | <b>0.006</b>     | 0.04                                        | 0.949        | 0.949        | -0.15                                        | 0.640            | 0.747            |
| Semantic fluency         | <b>-0.43</b>           | <b>&lt;0.001</b> | <b>&lt;0.001</b> | 0.08                                        | 0.865        | 0.949        | <b>0.57</b>                                  | <b>0.025</b>     | 0.117            |
| Verbal fluency           | <b>-0.36</b>           | <b>&lt;0.001</b> | <b>&lt;0.001</b> | -0.55                                       | 0.130        | 0.304        | 0.14                                         | 0.480            | 0.747            |
| Trail-Making A           | 0.01                   | 0.943            | 0.943            | 0.06                                        | 0.915        | 0.949        | 0.10                                         | 0.747            | 0.805            |
| Trail-Making B           | <b>-0.55</b>           | <b>&lt;0.001</b> | <b>&lt;0.001</b> | <b>-1.39</b>                                | <b>0.002</b> | <b>0.031</b> | 0.36                                         | 0.135            | 0.471            |
| Digit symbol coding      | <b>-0.59</b>           | <b>&lt;0.001</b> | <b>&lt;0.001</b> | 0.51                                        | 0.080        | 0.277        | 0.17                                         | 0.284            | 0.747            |
| CVLT recall              | 0.02                   | 0.845            | 0.910            | -0.08                                       | 0.883        | 0.949        | -0.17                                        | 0.535            | 0.747            |
| CVLT recognition         | -0.02                  | 0.816            | 0.910            | -0.04                                       | 0.934        | 0.949        | -0.22                                        | 0.448            | 0.747            |
| Span forward             | 0.08                   | 0.477            | 0.668            | -0.06                                       | 0.933        | 0.949        | -0.21                                        | 0.554            | 0.747            |
| Span backward            | 0.05                   | 0.539            | 0.687            | 0.07                                        | 0.901        | 0.949        | -0.04                                        | 0.890            | 0.890            |
| Letter number sequencing | <b>-0.62</b>           | <b>&lt;0.001</b> | <b>&lt;0.001</b> | <b>-1.05</b>                                | <b>0.046</b> | 0.213        | 0.15                                         | 0.604            | 0.747            |

Bolded estimates signify statistical significance ( $p < 0.05$ )

WTAR = Wechsler Test of Adult Reading

<sup>FDR</sup> Corrected for multiple testing (FDR = 0.05)

**Table S5** Group and group-by-age interaction effects of regression analyses adjusting for sex and psychiatric comorbidity

| Cognitive measure        | Affective psychosis |              |              |                                             |                  |                  |                                              |                  |                  |
|--------------------------|---------------------|--------------|--------------|---------------------------------------------|------------------|------------------|----------------------------------------------|------------------|------------------|
|                          | Group effect        |              |              | Group-by-age interaction<br>Early adulthood |                  |                  | Group-by-age interaction<br>Middle adulthood |                  |                  |
|                          | $\beta$             | $p$          | $p^{FDR}$    | $\beta$                                     | $p$              | $p^{FDR}$        | $\beta$                                      | $p$              | $p^{FDR}$        |
| g                        | -0.11               | 0.101        | 0.177        | <b>0.78</b>                                 | <b>0.025</b>     | 0.088            | 0.39                                         | 0.039            | 0.078            |
| WTAR                     | 0.09                | 0.204        | 0.285        | 0.72                                        | 0.081            | 0.113            | <b>0.89</b>                                  | <b>&lt;0.001</b> | <b>0.001</b>     |
| Vocabulary               | 0.00                | 0.972        | 0.972        | -0.70                                       | 0.067            | 0.104            | <b>0.62</b>                                  | <b>0.003</b>     | <b>0.009</b>     |
| Matrix reasoning         | 0.04                | 0.684        | 0.798        | <b>1.42</b>                                 | <b>0.009</b>     | <b>0.043</b>     | 0.44                                         | 0.132            | 0.231            |
| Semantic fluency         | <b>-0.21</b>        | <b>0.010</b> | <b>0.023</b> | 0.88                                        | 0.055            | 0.103            | <b>1.15</b>                                  | <b>&lt;0.001</b> | <b>&lt;0.001</b> |
| Verbal fluency           | 0.04                | 0.542        | 0.689        | 0.13                                        | 0.721            | 0.841            | -0.18                                        | 0.365            | 0.511            |
| Trail-Making A           | -0.13               | 0.057        | 0.113        | -0.03                                       | 0.950            | 0.950            | -0.13                                        | 0.555            | 0.618            |
| Trail-Making B           | -0.10               | 0.175        | 0.272        | 0.46                                        | 0.296            | 0.377            | 0.09                                         | 0.708            | 0.708            |
| Digit symbol coding      | <b>-0.15</b>        | <b>0.003</b> | <b>0.018</b> | <b>1.05</b>                                 | <b>&lt;0.001</b> | <b>0.001</b>     | <b>0.51</b>                                  | <b>0.001</b>     | <b>0.003</b>     |
| CVLT recall              | <b>-0.25</b>        | <b>0.001</b> | <b>0.010</b> | <b>1.77</b>                                 | <b>&lt;0.001</b> | <b>&lt;0.001</b> | <b>0.83</b>                                  | <b>&lt;0.001</b> | <b>&lt;0.001</b> |
| CVLT recognition         | <b>-0.21</b>        | <b>0.009</b> | <b>0.023</b> | 0.98                                        | 0.043            | 0.103            | 0.33                                         | 0.212            | 0.330            |
| Span forward             | 0.01                | 0.935        | 0.972        | 1.14                                        | 0.046            | 0.103            | -0.17                                        | 0.574            | 0.618            |
| Span backward            | <b>0.18</b>         | <b>0.006</b> | <b>0.022</b> | 0.04                                        | 0.916            | 0.950            | <b>0.58</b>                                  | <b>0.009</b>     | <b>0.021</b>     |
| Letter number sequencing | <b>-0.25</b>        | <b>0.006</b> | <b>0.022</b> | 0.99                                        | 0.059            | 0.103            | 0.23                                         | 0.420            | 0.535            |

  

| Cognitive measure        | Nonaffective psychosis |                  |                  |                                             |              |              |                                              |                  |                  |
|--------------------------|------------------------|------------------|------------------|---------------------------------------------|--------------|--------------|----------------------------------------------|------------------|------------------|
|                          | Group effect           |                  |                  | Group-by-age interaction<br>Early adulthood |              |              | Group-by-age interaction<br>Middle adulthood |                  |                  |
|                          | $\beta$                | $p$              | $p^{FDR}$        | $\beta$                                     | $p$          | $p^{FDR}$    | $\beta$                                      | $p$              | $p^{FDR}$        |
| g                        | <b>-0.58</b>           | <b>&lt;0.001</b> | <b>&lt;0.001</b> | <b>-0.86</b>                                | <b>0.014</b> | 0.072        | <b>0.72</b>                                  | <b>&lt;0.001</b> | <b>0.001</b>     |
| WTAR                     | <b>-0.19</b>           | <b>0.011</b>     | <b>0.013</b>     | -0.40                                       | 0.334        | 0.519        | 0.21                                         | 0.345            | 0.483            |
| Vocabulary               | -0.13                  | 0.049            | 0.053            | 0.38                                        | 0.318        | 0.519        | <b>0.81</b>                                  | <b>&lt;0.001</b> | <b>0.001</b>     |
| Matrix reasoning         | -0.18                  | 0.056            | 0.056            | -0.33                                       | 0.541        | 0.642        | -0.24                                        | 0.419            | 0.534            |
| Semantic fluency         | <b>-0.30</b>           | <b>&lt;0.001</b> | <b>&lt;0.001</b> | -0.05                                       | 0.914        | 0.914        | <b>0.57</b>                                  | <b>0.024</b>     | 0.068            |
| Verbal fluency           | <b>-0.24</b>           | <b>&lt;0.001</b> | <b>&lt;0.001</b> | <b>-0.81</b>                                | <b>0.028</b> | 0.097        | 0.09                                         | 0.643            | 0.750            |
| Trail-Making A           | <b>-0.38</b>           | <b>&lt;0.001</b> | <b>&lt;0.001</b> | -0.34                                       | 0.405        | 0.567        | -0.34                                        | 0.127            | 0.255            |
| Trail-Making B           | <b>-0.47</b>           | <b>&lt;0.001</b> | <b>&lt;0.001</b> | <b>-1.38</b>                                | <b>0.002</b> | <b>0.031</b> | 0.06                                         | 0.812            | 0.874            |
| Digit symbol coding      | <b>-0.49</b>           | <b>&lt;0.001</b> | <b>&lt;0.001</b> | 0.14                                        | 0.596        | 0.642        | 0.25                                         | 0.096            | 0.223            |
| CVLT recall              | <b>-0.28</b>           | <b>&lt;0.001</b> | <b>&lt;0.001</b> | 0.36                                        | 0.303        | 0.519        | <b>1.24</b>                                  | <b>&lt;0.001</b> | <b>&lt;0.001</b> |
| CVLT recognition         | <b>-0.29</b>           | <b>&lt;0.001</b> | <b>&lt;0.001</b> | 0.76                                        | 0.117        | 0.272        | 0.27                                         | 0.312            | 0.483            |
| Span forward             | <b>-0.43</b>           | <b>&lt;0.001</b> | <b>&lt;0.001</b> | <b>1.39</b>                                 | <b>0.015</b> | 0.072        | <b>0.98</b>                                  | <b>0.002</b>     | <b>0.007</b>     |
| Span backward            | <b>-0.29</b>           | <b>&lt;0.001</b> | <b>&lt;0.001</b> | 0.22                                        | 0.573        | 0.642        | 0.22                                         | 0.312            | 0.483            |
| Letter number sequencing | <b>-0.48</b>           | <b>&lt;0.001</b> | <b>&lt;0.001</b> | -0.96                                       | 0.068        | 0.190        | 0.00                                         | 0.992            | 0.992            |

Bolded estimates signify statistical significance ( $p < 0.05$ )

WTAR = Wechsler Test of Adult Reading

<sup>FDR</sup> Corrected for multiple testing (FDR = 0.05)



**Table S6** Group and group-by-age interaction effects of regression analyses adjusting for sex and current substance dependence

| Cognitive measure        | Affective psychosis    |                  |                  |                                             |                  |              |                                              |                  |                  |
|--------------------------|------------------------|------------------|------------------|---------------------------------------------|------------------|--------------|----------------------------------------------|------------------|------------------|
|                          | Group effect           |                  |                  | Group-by-age interaction<br>Early adulthood |                  |              | Group-by-age interaction<br>Middle adulthood |                  |                  |
|                          | $\beta$                | $p$              | $p^{FDR}$        | $\beta$                                     | $p$              | $p^{FDR}$    | $\beta$                                      | $p$              | $p^{FDR}$        |
| g                        | <b>-0.47</b>           | <b>&lt;0.001</b> | <b>&lt;0.001</b> | 0.38                                        | 0.287            | 0.447        | 0.38                                         | 0.048            | 0.112            |
| WTAR                     | <b>-0.20</b>           | <b>0.005</b>     | <b>0.007</b>     | 0.37                                        | 0.360            | 0.505        | <b>0.76</b>                                  | <b>0.001</b>     | <b>0.003</b>     |
| Vocabulary               | <b>-0.24</b>           | <b>0.003</b>     | <b>0.005</b>     | <b>-1.18</b>                                | <b>0.007</b>     | <b>0.046</b> | <b>0.61</b>                                  | <b>0.010</b>     | <b>0.027</b>     |
| Matrix reasoning         | -0.13                  | 0.152            | 0.164            | <b>1.41</b>                                 | <b>0.010</b>     | <b>0.047</b> | 0.53                                         | 0.074            | 0.149            |
| Semantic fluency         | <b>-0.44</b>           | <b>&lt;0.001</b> | <b>&lt;0.001</b> | 0.49                                        | 0.276            | 0.447        | <b>0.96</b>                                  | <b>&lt;0.001</b> | <b>0.001</b>     |
| Verbal fluency           | <b>-0.15</b>           | <b>0.010</b>     | <b>0.013</b>     | -0.21                                       | 0.564            | 0.658        | -0.29                                        | 0.148            | 0.231            |
| Trail-Making A           | <b>-0.42</b>           | <b>&lt;0.001</b> | <b>&lt;0.001</b> | -0.26                                       | 0.438            | 0.558        | -0.20                                        | 0.265            | 0.337            |
| Trail-Making B           | <b>-0.33</b>           | <b>&lt;0.001</b> | <b>&lt;0.001</b> | 0.05                                        | 0.903            | 0.903        | 0.02                                         | 0.912            | 0.912            |
| Digit symbol coding      | <b>-0.45</b>           | <b>&lt;0.001</b> | <b>&lt;0.001</b> | <b>0.67</b>                                 | <b>0.021</b>     | 0.075        | <b>0.52</b>                                  | <b>0.001</b>     | <b>0.004</b>     |
| CVLT recall              | <b>-0.52</b>           | <b>&lt;0.001</b> | <b>&lt;0.001</b> | <b>1.46</b>                                 | <b>&lt;0.001</b> | <b>0.001</b> | <b>0.85</b>                                  | <b>&lt;0.001</b> | <b>&lt;0.001</b> |
| CVLT recognition         | <b>-0.34</b>           | <b>&lt;0.001</b> | <b>&lt;0.001</b> | 0.92                                        | 0.058            | 0.164        | 0.32                                         | 0.227            | 0.318            |
| Span forward             | -0.17                  | 0.097            | 0.113            | 0.93                                        | 0.110            | 0.257        | -0.20                                        | 0.519            | 0.606            |
| Span backward            | 0.01                   | 0.883            | 0.883            | -0.08                                       | 0.850            | 0.903        | 0.41                                         | 0.086            | 0.151            |
| Letter number sequencing | <b>-0.46</b>           | <b>&lt;0.001</b> | <b>&lt;0.001</b> | 0.70                                        | 0.256            | 0.447        | 0.13                                         | 0.690            | 0.743            |
| Cognitive measure        | Nonaffective psychosis |                  |                  |                                             |                  |              |                                              |                  |                  |
|                          | Group effect           |                  |                  | Group-by-age interaction<br>Early adulthood |                  |              | Group-by-age interaction<br>Middle adulthood |                  |                  |
|                          | $\beta$                | $p$              | $p^{FDR}$        | $\beta$                                     | $p$              | $p^{FDR}$    | $\beta$                                      | $p$              | $p^{FDR}$        |
| g                        | <b>-0.80</b>           | <b>&lt;0.001</b> | <b>&lt;0.001</b> | <b>-0.77</b>                                | <b>0.030</b>     | 0.105        | <b>0.58</b>                                  | <b>0.003</b>     | <b>0.011</b>     |
| WTAR                     | <b>-0.38</b>           | <b>&lt;0.001</b> | <b>&lt;0.001</b> | -0.07                                       | 0.868            | 0.868        | 0.17                                         | 0.450            | 0.692            |
| Vocabulary               | <b>-0.22</b>           | <b>0.006</b>     | <b>0.006</b>     | 0.74                                        | 0.085            | 0.239        | <b>0.84</b>                                  | <b>&lt;0.001</b> | <b>0.002</b>     |
| Matrix reasoning         | <b>-0.26</b>           | <b>0.005</b>     | <b>0.006</b>     | 0.18                                        | 0.743            | 0.800        | -0.10                                        | 0.723            | 0.841            |
| Semantic fluency         | <b>-0.42</b>           | <b>&lt;0.001</b> | <b>&lt;0.001</b> | 0.35                                        | 0.438            | 0.682        | <b>0.63</b>                                  | <b>0.011</b>     | <b>0.030</b>     |
| Verbal fluency           | <b>-0.37</b>           | <b>&lt;0.001</b> | <b>&lt;0.001</b> | -0.37                                       | 0.306            | 0.611        | 0.12                                         | 0.544            | 0.692            |
| Trail-Making A           | <b>-0.59</b>           | <b>&lt;0.001</b> | <b>&lt;0.001</b> | -0.14                                       | 0.674            | 0.787        | -0.16                                        | 0.381            | 0.667            |
| Trail-Making B           | <b>-0.58</b>           | <b>&lt;0.001</b> | <b>&lt;0.001</b> | <b>-1.32</b>                                | <b>0.001</b>     | <b>0.019</b> | 0.06                                         | 0.781            | 0.841            |
| Digit symbol coding      | <b>-0.61</b>           | <b>&lt;0.001</b> | <b>&lt;0.001</b> | <b>0.76</b>                                 | <b>0.009</b>     | 0.053        | 0.23                                         | 0.136            | 0.317            |
| CVLT recall              | <b>-0.47</b>           | <b>&lt;0.001</b> | <b>&lt;0.001</b> | 0.15                                        | 0.671            | 0.787        | <b>1.32</b>                                  | <b>&lt;0.001</b> | <b>&lt;0.001</b> |
| CVLT recognition         | <b>-0.40</b>           | <b>&lt;0.001</b> | <b>&lt;0.001</b> | 0.78                                        | 0.108            | 0.252        | 0.25                                         | 0.340            | 0.667            |
| Span forward             | <b>-0.55</b>           | <b>&lt;0.001</b> | <b>&lt;0.001</b> | <b>1.48</b>                                 | <b>0.011</b>     | 0.053        | <b>1.15</b>                                  | <b>&lt;0.001</b> | <b>0.002</b>     |
| Span backward            | <b>-0.44</b>           | <b>&lt;0.001</b> | <b>&lt;0.001</b> | 0.37                                        | 0.390            | 0.682        | 0.15                                         | 0.531            | 0.692            |
| Letter number sequencing | <b>-0.54</b>           | <b>&lt;0.001</b> | <b>&lt;0.001</b> | -0.29                                       | 0.633            | 0.787        | -0.04                                        | 0.895            | 0.895            |

Bolded estimates signify statistical significance ( $p < 0.05$ )

WTAR = Wechsler Test of Adult Reading; CVLT = California Verbal Learning Test

<sup>FDR</sup> Corrected for multiple testing (FDR = 0.05)

**Table S7** Group and group-by-age interaction effects of regression analyses adjusting for sex and lifetime substance dependence

| Cognitive measure        | Affective psychosis |                  |                  |                                             |                  |                  |                                              |                  |                  |
|--------------------------|---------------------|------------------|------------------|---------------------------------------------|------------------|------------------|----------------------------------------------|------------------|------------------|
|                          | Group effect        |                  |                  | Group-by-age interaction<br>Early adulthood |                  |                  | Group-by-age interaction<br>Middle adulthood |                  |                  |
|                          | $\beta$             | $p$              | $p^{FDR}$        | $\beta$                                     | $p$              | $p^{FDR}$        | $\beta$                                      | $p$              | $p^{FDR}$        |
| g                        | <b>-0.31</b>        | <b>&lt;0.001</b> | <b>&lt;0.001</b> | <b>0.83</b>                                 | <b>0.024</b>     | 0.069            | 0.25                                         | 0.210            | 0.294            |
| WTAR                     | 0.03                | 0.621            | 0.621            | 0.55                                        | 0.179            | 0.279            | <b>0.83</b>                                  | <b>&lt;0.001</b> | <b>0.001</b>     |
| Vocabulary               | <b>-0.15</b>        | <b>0.036</b>     | 0.056            | <b>-1.07</b>                                | <b>0.007</b>     | <b>0.033</b>     | 0.39                                         | 0.071            | 0.165            |
| Matrix reasoning         | -0.07               | 0.446            | 0.480            | <b>1.18</b>                                 | <b>0.025</b>     | 0.069            | 0.38                                         | 0.181            | 0.281            |
| Semantic fluency         | <b>-0.42</b>        | <b>&lt;0.001</b> | <b>&lt;0.001</b> | 0.54                                        | 0.227            | 0.317            | <b>1.10</b>                                  | <b>&lt;0.001</b> | <b>&lt;0.001</b> |
| Verbal fluency           | -0.08               | 0.172            | 0.241            | -0.11                                       | 0.748            | 0.748            | -0.37                                        | 0.055            | 0.154            |
| Trail-Making A           | <b>-0.35</b>        | <b>&lt;0.001</b> | <b>&lt;0.001</b> | -0.35                                       | 0.382            | 0.486            | -0.33                                        | 0.135            | 0.236            |
| Trail-Making B           | <b>-0.25</b>        | <b>0.001</b>     | <b>0.002</b>     | 0.21                                        | 0.624            | 0.672            | -0.01                                        | 0.970            | 0.970            |
| Digit symbol coding      | <b>-0.36</b>        | <b>&lt;0.001</b> | <b>&lt;0.001</b> | <b>0.89</b>                                 | <b>0.004</b>     | <b>0.027</b>     | 0.27                                         | 0.105            | 0.210            |
| CVLT recall              | <b>-0.36</b>        | <b>&lt;0.001</b> | <b>&lt;0.001</b> | <b>1.94</b>                                 | <b>&lt;0.001</b> | <b>&lt;0.001</b> | <b>0.72</b>                                  | <b>&lt;0.001</b> | <b>0.001</b>     |
| CVLT recognition         | <b>-0.22</b>        | <b>0.004</b>     | <b>0.007</b>     | <b>0.92</b>                                 | <b>0.049</b>     | 0.114            | 0.27                                         | 0.293            | 0.373            |
| Span forward             | -0.13               | 0.209            | 0.266            | 0.90                                        | 0.126            | 0.231            | -0.21                                        | 0.515            | 0.601            |
| Span backward            | 0.08                | 0.257            | 0.300            | 0.24                                        | 0.580            | 0.672            | <b>0.56</b>                                  | <b>0.019</b>     | 0.068            |
| Letter number sequencing | <b>-0.37</b>        | <b>&lt;0.001</b> | <b>&lt;0.001</b> | 0.82                                        | 0.132            | 0.231            | 0.05                                         | 0.859            | 0.925            |

  

| Cognitive measure        | Nonaffective psychosis |                  |                  |                                             |              |              |                                              |                  |                  |
|--------------------------|------------------------|------------------|------------------|---------------------------------------------|--------------|--------------|----------------------------------------------|------------------|------------------|
|                          | Group effect           |                  |                  | Group-by-age interaction<br>Early adulthood |              |              | Group-by-age interaction<br>Middle adulthood |                  |                  |
|                          | $\beta$                | $p$              | $p^{FDR}$        | $\beta$                                     | $p$          | $p^{FDR}$    | $\beta$                                      | $p$              | $p^{FDR}$        |
| g                        | <b>-0.71</b>           | <b>&lt;0.001</b> | <b>&lt;0.001</b> | -0.43                                       | 0.234        | 0.547        | <b>0.59</b>                                  | <b>0.003</b>     | <b>0.016</b>     |
| WTAR                     | <b>-0.19</b>           | <b>0.010</b>     | <b>0.010</b>     | -0.31                                       | 0.447        | 0.626        | 0.18                                         | 0.417            | 0.584            |
| Vocabulary               | <b>-0.19</b>           | <b>0.006</b>     | <b>0.007</b>     | 0.56                                        | 0.152        | 0.533        | <b>0.52</b>                                  | <b>0.016</b>     | 0.056            |
| Matrix reasoning         | <b>-0.24</b>           | <b>0.006</b>     | <b>0.007</b>     | -0.06                                       | 0.910        | 0.910        | -0.29                                        | 0.302            | 0.582            |
| Semantic fluency         | <b>-0.40</b>           | <b>&lt;0.001</b> | <b>&lt;0.001</b> | 0.07                                        | 0.868        | 0.910        | <b>0.52</b>                                  | <b>0.034</b>     | 0.082            |
| Verbal fluency           | <b>-0.29</b>           | <b>&lt;0.001</b> | <b>&lt;0.001</b> | <b>-0.72</b>                                | <b>0.042</b> | 0.198        | -0.09                                        | 0.629            | 0.734            |
| Trail-Making A           | <b>-0.53</b>           | <b>&lt;0.001</b> | <b>&lt;0.001</b> | -0.30                                       | 0.444        | 0.626        | <b>-0.46</b>                                 | <b>0.035</b>     | 0.082            |
| Trail-Making B           | <b>-0.53</b>           | <b>&lt;0.001</b> | <b>&lt;0.001</b> | <b>-1.27</b>                                | <b>0.003</b> | <b>0.044</b> | -0.02                                        | 0.916            | 0.916            |
| Digit symbol coding      | <b>-0.57</b>           | <b>&lt;0.001</b> | <b>&lt;0.001</b> | 0.26                                        | 0.398        | 0.626        | 0.07                                         | 0.683            | 0.735            |
| CVLT recall              | <b>-0.43</b>           | <b>&lt;0.001</b> | <b>&lt;0.001</b> | 0.37                                        | 0.298        | 0.596        | <b>1.19</b>                                  | <b>&lt;0.001</b> | <b>&lt;0.001</b> |
| CVLT recognition         | <b>-0.32</b>           | <b>&lt;0.001</b> | <b>&lt;0.001</b> | 0.58                                        | 0.208        | 0.547        | 0.22                                         | 0.382            | 0.584            |
| Span forward             | <b>-0.54</b>           | <b>&lt;0.001</b> | <b>&lt;0.001</b> | <b>1.37</b>                                 | <b>0.020</b> | 0.143        | <b>1.14</b>                                  | <b>0.001</b>     | <b>0.004</b>     |
| Span backward            | <b>-0.38</b>           | <b>&lt;0.001</b> | <b>&lt;0.001</b> | 0.07                                        | 0.870        | 0.910        | 0.23                                         | 0.333            | 0.582            |
| Letter number sequencing | <b>-0.50</b>           | <b>&lt;0.001</b> | <b>&lt;0.001</b> | -0.30                                       | 0.587        | 0.747        | -0.17                                        | 0.569            | 0.725            |

Bolded estimates signify statistical significance ( $p < 0.05$ )

WTAR = Wechsler Test of Adult Reading; CVLT = California Verbal Learning Test

<sup>FDR</sup> Corrected for multiple testing (FDR = 0.05)

**Table S8** Group and group-by-age interaction effects of regression analyses adjusting for sex and symptom severity

| Cognitive measure        | Affective psychosis    |                  |                  |                                             |                  |                  |                                              |                  |                  |
|--------------------------|------------------------|------------------|------------------|---------------------------------------------|------------------|------------------|----------------------------------------------|------------------|------------------|
|                          | Group effect           |                  |                  | Group-by-age interaction<br>Early adulthood |                  |                  | Group-by-age interaction<br>Middle adulthood |                  |                  |
|                          | $\beta$                | $p$              | $p^{FDR}$        | $\beta$                                     | $p$              | $p^{FDR}$        | $\beta$                                      | $p$              | $p^{FDR}$        |
| g                        | -0.06                  | 0.310            | 0.543            | <b>0.82</b>                                 | <b>0.015</b>     | 0.069            | 0.27                                         | 0.140            | 0.244            |
| WTAR                     | -0.06                  | 0.400            | 0.617            | 0.63                                        | 0.130            | 0.303            | <b>0.70</b>                                  | <b>0.002</b>     | <b>0.013</b>     |
| Vocabulary               | -0.02                  | 0.770            | 0.770            | <b>-0.96</b>                                | <b>0.026</b>     | 0.073            | 0.46                                         | 0.050            | 0.125            |
| Matrix reasoning         | 0.12                   | 0.201            | 0.469            | <b>1.29</b>                                 | <b>0.025</b>     | 0.073            | 0.39                                         | 0.205            | 0.319            |
| Semantic fluency         | -0.05                  | 0.492            | 0.626            | 0.09                                        | 0.831            | 0.831            | <b>1.07</b>                                  | <b>&lt;0.001</b> | <b>&lt;0.001</b> |
| Verbal fluency           | <b>0.13</b>            | <b>0.027</b>     | 0.113            | -0.51                                       | 0.175            | 0.351            | -0.15                                        | 0.452            | 0.487            |
| Trail-Making A           | 0.03                   | 0.615            | 0.672            | -0.36                                       | 0.247            | 0.432            | -0.32                                        | 0.062            | 0.125            |
| Trail-Making B           | 0.03                   | 0.624            | 0.672            | 0.31                                        | 0.410            | 0.521            | -0.12                                        | 0.565            | 0.565            |
| Digit symbol coding      | <b>0.16</b>            | <b>0.001</b>     | <b>0.004</b>     | 0.25                                        | 0.325            | 0.456            | <b>0.41</b>                                  | <b>0.003</b>     | <b>0.013</b>     |
| CVLT recall              | -0.06                  | 0.441            | 0.617            | <b>1.87</b>                                 | <b>&lt;0.001</b> | <b>&lt;0.001</b> | <b>0.40</b>                                  | <b>0.045</b>     | 0.125            |
| CVLT recognition         | -0.09                  | 0.235            | 0.470            | <b>1.22</b>                                 | <b>0.011</b>     | 0.069            | 0.24                                         | 0.345            | 0.439            |
| Span forward             | 0.21                   | 0.032            | 0.113            | 0.59                                        | 0.287            | 0.446            | -0.23                                        | 0.452            | 0.487            |
| Span backward            | <b>0.28</b>            | <b>&lt;0.001</b> | <b>0.002</b>     | -0.11                                       | 0.798            | 0.831            | 0.46                                         | 0.058            | 0.125            |
| Letter number sequencing | -0.11                  | 0.201            | 0.469            | 0.21                                        | 0.684            | 0.798            | 0.33                                         | 0.255            | 0.356            |
| Cognitive measure        | Nonaffective psychosis |                  |                  |                                             |                  |                  |                                              |                  |                  |
|                          | Group effect           |                  |                  | Group-by-age interaction<br>Early adulthood |                  |                  | Group-by-age interaction<br>Middle adulthood |                  |                  |
|                          | $\beta$                | $p$              | $p^{FDR}$        | $\beta$                                     | $p$              | $p^{FDR}$        | $\beta$                                      | $p$              | $p^{FDR}$        |
| g                        | <b>-0.30</b>           | <b>&lt;0.001</b> | <b>&lt;0.001</b> | -0.44                                       | 0.183            | 0.365            | <b>0.44</b>                                  | <b>0.017</b>     | <b>0.048</b>     |
| WTAR                     | <b>-0.25</b>           | <b>&lt;0.001</b> | <b>0.002</b>     | 0.08                                        | 0.855            | 0.855            | 0.10                                         | 0.648            | 0.825            |
| Vocabulary               | -0.02                  | 0.751            | 0.751            | <b>1.09</b>                                 | <b>0.011</b>     | <b>0.039</b>     | <b>0.65</b>                                  | <b>0.006</b>     | <b>0.028</b>     |
| Matrix reasoning         | -0.06                  | 0.530            | 0.571            | 0.41                                        | 0.469            | 0.656            | -0.22                                        | 0.486            | 0.690            |
| Semantic fluency         | -0.06                  | 0.371            | 0.520            | 0.20                                        | 0.627            | 0.767            | <b>0.70</b>                                  | <b>0.002</b>     | <b>0.013</b>     |
| Verbal fluency           | -0.05                  | 0.439            | 0.558            | -0.40                                       | 0.287            | 0.446            | 0.02                                         | 0.939            | 0.939            |
| Trail-Making A           | <b>-0.17</b>           | <b>0.001</b>     | <b>0.004</b>     | -0.14                                       | 0.657            | 0.767            | -0.29                                        | 0.095            | 0.223            |
| Trail-Making B           | <b>-0.30</b>           | <b>&lt;0.001</b> | <b>&lt;0.001</b> | <b>-1.19</b>                                | <b>0.002</b>     | <b>0.011</b>     | 0.14                                         | 0.493            | 0.690            |
| Digit symbol coding      | 0.03                   | 0.491            | 0.571            | <b>0.99</b>                                 | <b>&lt;0.001</b> | <b>0.002</b>     | 0.04                                         | 0.743            | 0.867            |
| CVLT recall              | -0.07                  | 0.344            | 0.520            | 0.68                                        | 0.061            | 0.143            | <b>1.25</b>                                  | <b>&lt;0.001</b> | <b>&lt;0.001</b> |
| CVLT recognition         | <b>-0.24</b>           | <b>0.003</b>     | <b>0.008</b>     | <b>1.07</b>                                 | <b>0.025</b>     | <b>0.071</b>     | 0.20                                         | 0.434            | 0.690            |
| Span forward             | <b>-0.24</b>           | <b>0.015</b>     | <b>0.035</b>     | <b>1.50</b>                                 | <b>0.007</b>     | <b>0.035</b>     | <b>0.77</b>                                  | <b>0.011</b>     | <b>0.039</b>     |
| Span backward            | -0.12                  | 0.093            | 0.187            | 0.14                                        | 0.749            | 0.806            | 0.03                                         | 0.915            | 0.939            |
| Letter number sequencing | -0.13                  | 0.136            | 0.238            | -0.62                                       | 0.239            | 0.418            | -0.35                                        | 0.221            | 0.442            |

Bolded estimates signify statistical significance ( $p < 0.05$ )

WTAR = Wechsler Test of Adult Reading; CVLT = California Verbal Learning Test

<sup>FDR</sup> Corrected for multiple testing (FDR = 0.05)

**Table S9** Group and group-by-age interaction effects of regression analyses adjusting for sex and duration of psychosis

| Cognitive measure        | Affective psychosis    |                  |                  |                                             |                  |                  |                                              |                  |                  |
|--------------------------|------------------------|------------------|------------------|---------------------------------------------|------------------|------------------|----------------------------------------------|------------------|------------------|
|                          | Group effect           |                  |                  | Group-by-age interaction<br>Early adulthood |                  |                  | Group-by-age interaction<br>Middle adulthood |                  |                  |
|                          | $\beta$                | $p$              | $p^{FDR}$        | $\beta$                                     | $p$              | $p^{FDR}$        | $\beta$                                      | $p$              | $p^{FDR}$        |
| g                        | -0.13                  | 0.052            | 0.125            | <b>1.19</b>                                 | <b>0.001</b>     | <b>0.002</b>     | <b>0.44</b>                                  | <b>0.018</b>     | <b>0.033</b>     |
| WTAR                     | -0.04                  | 0.590            | 0.751            | <b>0.81</b>                                 | <b>0.035</b>     | 0.071            | <b>0.82</b>                                  | <b>&lt;0.001</b> | <b>0.001</b>     |
| Vocabulary               | 0.02                   | 0.726            | 0.847            | -0.32                                       | 0.412            | 0.481            | <b>0.63</b>                                  | <b>0.004</b>     | <b>0.013</b>     |
| Matrix reasoning         | 0.07                   | 0.410            | 0.574            | <b>1.66</b>                                 | <b>0.001</b>     | <b>0.005</b>     | <b>0.66</b>                                  | <b>0.019</b>     | <b>0.033</b>     |
| Semantic fluency         | <b>-0.21</b>           | <b>0.011</b>     | 0.075            | <b>0.97</b>                                 | <b>0.026</b>     | 0.062            | <b>1.24</b>                                  | <b>&lt;0.001</b> | <b>&lt;0.001</b> |
| Verbal fluency           | 0.12                   | 0.053            | 0.125            | 0.24                                        | 0.519            | 0.559            | -0.11                                        | 0.600            | 0.700            |
| Trail-Making A           | 0.00                   | 0.984            | 0.984            | 0.33                                        | 0.404            | 0.481            | 0.03                                         | 0.896            | 0.896            |
| Trail-Making B           | 0.07                   | 0.258            | 0.401            | <b>0.77</b>                                 | <b>0.048</b>     | 0.071            | 0.18                                         | 0.399            | 0.507            |
| Digit symbol coding      | 0.11                   | 0.090            | 0.181            | <b>1.80</b>                                 | <b>&lt;0.001</b> | <b>&lt;0.001</b> | <b>0.48</b>                                  | <b>0.010</b>     | <b>0.027</b>     |
| CVLT recall              | <b>-0.28</b>           | <b>0.001</b>     | <b>0.008</b>     | <b>2.03</b>                                 | <b>&lt;0.001</b> | <b>&lt;0.001</b> | <b>0.81</b>                                  | <b>&lt;0.001</b> | <b>0.001</b>     |
| CVLT recognition         | <b>-0.18</b>           | <b>0.026</b>     | 0.091            | <b>1.28</b>                                 | <b>0.007</b>     | <b>0.019</b>     | <b>0.53</b>                                  | <b>0.038</b>     | 0.059            |
| Span forward             | 0.01                   | 0.938            | 0.984            | 1.16                                        | 0.050            | 0.071            | -0.09                                        | 0.787            | 0.848            |
| Span backward            | <b>0.17</b>            | <b>0.018</b>     | 0.084            | 0.13                                        | 0.758            | 0.758            | <b>0.56</b>                                  | <b>0.019</b>     | <b>0.033</b>     |
| Letter number sequencing | -0.12                  | 0.177            | 0.310            | <b>1.09</b>                                 | <b>0.046</b>     | 0.071            | 0.26                                         | 0.378            | 0.507            |
| Cognitive measure        | Nonaffective psychosis |                  |                  |                                             |                  |                  |                                              |                  |                  |
|                          | Group effect           |                  |                  | Group-by-age interaction<br>Early adulthood |                  |                  | Group-by-age interaction<br>Middle adulthood |                  |                  |
|                          | $\beta$                | $p$              | $p^{FDR}$        | $\beta$                                     | $p$              | $p^{FDR}$        | $\beta$                                      | $p$              | $p^{FDR}$        |
| g                        | <b>-0.44</b>           | <b>&lt;0.001</b> | <b>&lt;0.001</b> | -0.40                                       | 0.237            | 0.414            | <b>0.81</b>                                  | <b>&lt;0.001</b> | <b>&lt;0.001</b> |
| WTAR                     | <b>-0.24</b>           | <b>&lt;0.001</b> | <b>0.002</b>     | 0.07                                        | 0.855            | 0.921            | 0.24                                         | 0.239            | 0.371            |
| Vocabulary               | -0.07                  | 0.325            | 0.350            | 0.77                                        | 0.051            | 0.180            | <b>0.95</b>                                  | <b>&lt;0.001</b> | <b>&lt;0.001</b> |
| Matrix reasoning         | -0.07                  | 0.442            | 0.442            | 0.50                                        | 0.325            | 0.455            | -0.02                                        | 0.939            | 0.939            |
| Semantic fluency         | <b>-0.32</b>           | <b>&lt;0.001</b> | <b>0.001</b>     | 0.08                                        | 0.853            | 0.921            | <b>0.55</b>                                  | <b>0.022</b>     | 0.062            |
| Verbal fluency           | -0.11                  | 0.085            | 0.108            | -0.03                                       | 0.943            | 0.943            | 0.17                                         | 0.411            | 0.576            |
| Trail-Making A           | <b>-0.16</b>           | <b>0.012</b>     | <b>0.016</b>     | 0.40                                        | 0.315            | 0.455            | -0.03                                        | 0.892            | 0.939            |
| Trail-Making B           | <b>-0.28</b>           | <b>&lt;0.001</b> | <b>&lt;0.001</b> | -0.62                                       | 0.108            | 0.221            | 0.07                                         | 0.742            | 0.866            |
| Digit symbol coding      | -0.10                  | 0.102            | 0.119            | <b>1.43</b>                                 | <b>&lt;0.001</b> | <b>0.001</b>     | 0.35                                         | 0.059            | 0.138            |
| CVLT recall              | <b>-0.25</b>           | <b>0.002</b>     | <b>0.004</b>     | 0.68                                        | 0.068            | 0.190            | <b>1.38</b>                                  | <b>&lt;0.001</b> | <b>&lt;0.001</b> |
| CVLT recognition         | <b>-0.21</b>           | <b>0.008</b>     | <b>0.012</b>     | <b>1.19</b>                                 | <b>0.012</b>     | 0.056            | 0.44                                         | 0.088            | 0.176            |
| Span forward             | <b>-0.35</b>           | <b>0.002</b>     | <b>0.004</b>     | <b>1.89</b>                                 | <b>0.002</b>     | <b>0.012</b>     | <b>1.37</b>                                  | <b>&lt;0.001</b> | <b>&lt;0.001</b> |
| Span backward            | <b>-0.21</b>           | <b>0.005</b>     | <b>0.009</b>     | 0.70                                        | 0.111            | 0.221            | 0.32                                         | 0.173            | 0.303            |
| Letter number sequencing | <b>-0.25</b>           | <b>0.006</b>     | <b>0.010</b>     | 0.12                                        | 0.828            | 0.921            | 0.14                                         | 0.643            | 0.818            |

Bolded estimates signify statistical significance ( $p < 0.05$ )

WTAR = Wechsler Test of Adult Reading; CVLT = California Verbal Learning Test

<sup>FDR</sup> Corrected for multiple testing (FDR = 0.05)

**Table S10** Group and group-by-age interaction effects of regression analyses adjusting for sex and education

| Cognitive measure        | Affective psychosis |                  |                  |                                             |              |              |                                              |              |              |
|--------------------------|---------------------|------------------|------------------|---------------------------------------------|--------------|--------------|----------------------------------------------|--------------|--------------|
|                          | Group effect        |                  |                  | Group-by-age interaction<br>Early adulthood |              |              | Group-by-age interaction<br>Middle adulthood |              |              |
|                          | $\beta$             | $p$              | $p^{FDR}$        | $\beta$                                     | $p$          | $p^{FDR}$    | $\beta$                                      | $p$          | $p^{FDR}$    |
| g                        | <b>-0.22</b>        | <b>0.001</b>     | <b>0.002</b>     | <b>0.88</b>                                 | <b>0.017</b> | <b>0.047</b> | 0.32                                         | 0.109        | 0.218        |
| WTAR                     | -0.02               | 0.795            | 0.795            | -0.56                                       | 0.275        | 0.427        | <b>0.65</b>                                  | <b>0.023</b> | 0.081        |
| Vocabulary               | -0.10               | 0.171            | 0.199            | <b>-1.22</b>                                | <b>0.004</b> | <b>0.028</b> | <b>0.52</b>                                  | <b>0.023</b> | 0.081        |
| Matrix reasoning         | -0.06               | 0.526            | 0.567            | <b>1.48</b>                                 | <b>0.009</b> | <b>0.033</b> | 0.22                                         | 0.462        | 0.647        |
| Semantic fluency         | <b>-0.39</b>        | <b>&lt;0.001</b> | <b>&lt;0.001</b> | 0.09                                        | 0.837        | 0.901        | <b>0.73</b>                                  | <b>0.002</b> | <b>0.012</b> |
| Verbal fluency           | -0.10               | 0.115            | 0.161            | <b>-1.10</b>                                | <b>0.006</b> | <b>0.028</b> | -0.18                                        | 0.413        | 0.643        |
| Trail-Making A           | <b>-0.29</b>        | <b>&lt;0.001</b> | <b>&lt;0.001</b> | <b>-0.81</b>                                | <b>0.044</b> | 0.088        | 0.05                                         | 0.828        | 0.828        |
| Trail-Making B           | <b>-0.19</b>        | <b>0.009</b>     | <b>0.016</b>     | -0.18                                       | 0.680        | 0.793        | -0.08                                        | 0.721        | 0.806        |
| Digit symbol coding      | <b>-0.33</b>        | <b>&lt;0.001</b> | <b>&lt;0.001</b> | 0.35                                        | 0.217        | 0.380        | <b>0.33</b>                                  | <b>0.034</b> | 0.096        |
| CVLT recall              | <b>-0.46</b>        | <b>&lt;0.001</b> | <b>&lt;0.001</b> | <b>1.13</b>                                 | <b>0.001</b> | <b>0.007</b> | 0.32                                         | 0.063        | 0.148        |
| CVLT recognition         | <b>-0.20</b>        | <b>0.009</b>     | <b>0.016</b>     | <b>1.02</b>                                 | <b>0.026</b> | 0.060        | 0.30                                         | 0.222        | 0.388        |
| Span forward             | -0.15               | 0.132            | 0.168            | -0.04                                       | 0.942        | 0.942        | -0.10                                        | 0.748        | 0.806        |
| Span backward            | <b>0.14</b>         | <b>0.028</b>     | <b>0.043</b>     | 0.37                                        | 0.313        | 0.438        | <b>0.64</b>                                  | <b>0.002</b> | <b>0.012</b> |
| Letter number sequencing | <b>-0.28</b>        | <b>0.001</b>     | <b>0.003</b>     | -0.28                                       | 0.575        | 0.731        | 0.17                                         | 0.528        | 0.672        |

  

| Cognitive measure        | Nonaffective psychosis |                  |                  |                                             |              |           |                                              |                  |                  |
|--------------------------|------------------------|------------------|------------------|---------------------------------------------|--------------|-----------|----------------------------------------------|------------------|------------------|
|                          | Group effect           |                  |                  | Group-by-age interaction<br>Early adulthood |              |           | Group-by-age interaction<br>Middle adulthood |                  |                  |
|                          | $\beta$                | $p$              | $p^{FDR}$        | $\beta$                                     | $p$          | $p^{FDR}$ | $\beta$                                      | $p$              | $p^{FDR}$        |
| g                        | <b>-0.60</b>           | <b>&lt;0.001</b> | <b>&lt;0.001</b> | -0.62                                       | 0.091        | 0.212     | 0.15                                         | 0.447            | 0.521            |
| WTAR                     | -0.12                  | 0.155            | 0.155            | -0.24                                       | 0.638        | 0.744     | 0.09                                         | 0.739            | 0.795            |
| Vocabulary               | <b>-0.16</b>           | <b>0.031</b>     | <b>0.033</b>     | 0.50                                        | 0.229        | 0.356     | 0.33                                         | 0.151            | 0.427            |
| Matrix reasoning         | <b>-0.23</b>           | <b>0.017</b>     | <b>0.020</b>     | 0.20                                        | 0.719        | 0.775     | -0.38                                        | 0.211            | 0.427            |
| Semantic fluency         | <b>-0.35</b>           | <b>&lt;0.001</b> | <b>&lt;0.001</b> | -0.29                                       | 0.481        | 0.612     | 0.39                                         | 0.089            | 0.414            |
| Verbal fluency           | <b>-0.32</b>           | <b>&lt;0.001</b> | <b>&lt;0.001</b> | -0.75                                       | 0.059        | 0.206     | 0.05                                         | 0.804            | 0.804            |
| Trail-Making A           | <b>-0.48</b>           | <b>&lt;0.001</b> | <b>&lt;0.001</b> | -0.34                                       | 0.393        | 0.550     | -0.24                                        | 0.275            | 0.427            |
| Trail-Making B           | <b>-0.49</b>           | <b>&lt;0.001</b> | <b>&lt;0.001</b> | <b>-1.01</b>                                | <b>0.021</b> | 0.206     | -0.24                                        | 0.314            | 0.439            |
| Digit symbol coding      | <b>-0.48</b>           | <b>&lt;0.001</b> | <b>&lt;0.001</b> | 0.46                                        | 0.108        | 0.216     | -0.20                                        | 0.196            | 0.427            |
| CVLT recall              | <b>-0.41</b>           | <b>&lt;0.001</b> | <b>&lt;0.001</b> | -0.09                                       | 0.777        | 0.777     | <b>0.84</b>                                  | <b>&lt;0.001</b> | <b>&lt;0.001</b> |
| CVLT recognition         | <b>-0.25</b>           | <b>0.001</b>     | <b>0.001</b>     | 0.67                                        | 0.142        | 0.248     | 0.21                                         | 0.389            | 0.495            |
| Span forward             | <b>-0.49</b>           | <b>&lt;0.001</b> | <b>&lt;0.001</b> | <b>1.22</b>                                 | <b>0.033</b> | 0.206     | <b>0.98</b>                                  | <b>0.002</b>     | <b>0.013</b>     |
| Span backward            | <b>-0.26</b>           | <b>&lt;0.001</b> | <b>&lt;0.001</b> | 0.72                                        | 0.053        | 0.206     | 0.22                                         | 0.268            | 0.427            |
| Letter number sequencing | <b>-0.45</b>           | <b>&lt;0.001</b> | <b>&lt;0.001</b> | -0.86                                       | 0.087        | 0.212     | -0.31                                        | 0.254            | 0.427            |

Bolded estimates signify statistical significance ( $p < 0.05$ )

WTAR = Wechsler Test of Adult Reading; CVLT = California Verbal Learning Test

<sup>FDR</sup> Corrected for multiple testing (FDR = 0.05)

**Table S11** Group and group-by-age interaction effects of regression analyses adjusting for sex and maternal education

| Cognitive measure        | Affective psychosis    |                  |                  |                                             |              |              |                                              |                  |                  |
|--------------------------|------------------------|------------------|------------------|---------------------------------------------|--------------|--------------|----------------------------------------------|------------------|------------------|
|                          | Group effect           |                  |                  | Group-by-age interaction<br>Early adulthood |              |              | Group-by-age interaction<br>Middle adulthood |                  |                  |
|                          | $\beta$                | $p$              | $p^{FDR}$        | $\beta$                                     | $p$          | $p^{FDR}$    | $\beta$                                      | $p$              | $p^{FDR}$        |
| g                        | <b>-0.37</b>           | <b>&lt;0.001</b> | <b>&lt;0.001</b> | 0.69                                        | 0.089        | 0.303        | 0.19                                         | 0.379            | 0.590            |
| WTAR                     | 0.09                   | 0.322            | 0.322            | 0.56                                        | 0.298        | 0.463        | 0.39                                         | 0.182            | 0.364            |
| Vocabulary               | 0.12                   | 0.185            | 0.216            | -0.36                                       | 0.512        | 0.652        | 0.55                                         | 0.073            | 0.203            |
| Matrix reasoning         | <b>-0.25</b>           | <b>0.017</b>     | <b>0.027</b>     | <b>2.06</b>                                 | <b>0.001</b> | <b>0.009</b> | 0.09                                         | 0.789            | 0.910            |
| Semantic fluency         | <b>-0.36</b>           | <b>&lt;0.001</b> | <b>&lt;0.001</b> | 0.15                                        | 0.744        | 0.757        | 0.65                                         | 0.013            | 0.093            |
| Verbal fluency           | -0.09                  | 0.227            | 0.244            | 0.15                                        | 0.757        | 0.757        | -0.20                                        | 0.442            | 0.619            |
| Trail-Making A           | <b>-0.34</b>           | <b>&lt;0.001</b> | <b>&lt;0.001</b> | <b>-0.68</b>                                | <b>0.035</b> | 0.161        | <b>-0.46</b>                                 | <b>0.009</b>     | 0.093            |
| Trail-Making B           | <b>-0.31</b>           | <b>&lt;0.001</b> | <b>&lt;0.001</b> | 0.31                                        | 0.437        | 0.611        | 0.02                                         | 0.914            | 0.914            |
| Digit symbol coding      | <b>-0.37</b>           | <b>&lt;0.001</b> | <b>&lt;0.001</b> | 0.59                                        | 0.134        | 0.303        | <b>0.43</b>                                  | <b>0.044</b>     | 0.175            |
| CVLT recall              | <b>-0.39</b>           | <b>&lt;0.001</b> | <b>&lt;0.001</b> | 0.24                                        | 0.623        | 0.727        | 0.25                                         | 0.335            | 0.586            |
| CVLT recognition         | <b>-0.27</b>           | <b>0.001</b>     | <b>0.001</b>     | 0.67                                        | 0.152        | 0.303        | -0.38                                        | 0.139            | 0.324            |
| Span forward             | <b>-0.35</b>           | <b>0.002</b>     | <b>0.004</b>     | <b>1.72</b>                                 | <b>0.010</b> | 0.069        | 0.07                                         | 0.845            | 0.910            |
| Span backward            | 0.11                   | 0.145            | 0.184            | 0.51                                        | 0.270        | 0.463        | <b>0.50</b>                                  | <b>0.050</b>     | 0.175            |
| Letter number sequencing | <b>-0.18</b>           | <b>0.034</b>     | <b>0.048</b>     | -0.78                                       | 0.118        | 0.303        | -0.15                                        | 0.590            | 0.751            |
| Cognitive measure        | Nonaffective psychosis |                  |                  |                                             |              |              |                                              |                  |                  |
|                          | Group effect           |                  |                  | Group-by-age interaction<br>Early adulthood |              |              | Group-by-age interaction<br>Middle adulthood |                  |                  |
|                          | $\beta$                | $p$              | $p^{FDR}$        | $\beta$                                     | $p$          | $p^{FDR}$    | $\beta$                                      | $p$              | $p^{FDR}$        |
| g                        | <b>-0.72</b>           | <b>&lt;0.001</b> | <b>&lt;0.001</b> | -0.58                                       | 0.151        | 0.302        | <b>0.46</b>                                  | <b>0.037</b>     | 0.085            |
| WTAR                     | -0.17                  | 0.058            | 0.058            | 0.11                                        | 0.845        | 0.845        | 0.54                                         | 0.067            | 0.134            |
| Vocabulary               | -0.18                  | 0.051            | 0.055            | 0.95                                        | 0.088        | 0.204        | <b>0.70</b>                                  | <b>0.022</b>     | 0.066            |
| Matrix reasoning         | <b>-0.40</b>           | <b>&lt;0.001</b> | <b>&lt;0.001</b> | -0.19                                       | 0.744        | 0.802        | -0.22                                        | 0.490            | 0.624            |
| Semantic fluency         | <b>-0.46</b>           | <b>&lt;0.001</b> | <b>&lt;0.001</b> | <b>1.13</b>                                 | <b>0.018</b> | 0.052        | <b>0.83</b>                                  | <b>0.002</b>     | 0.012            |
| Verbal fluency           | <b>-0.42</b>           | <b>&lt;0.001</b> | <b>&lt;0.001</b> | -0.42                                       | 0.373        | 0.522        | 0.30                                         | 0.241            | 0.375            |
| Trail-Making A           | <b>-0.49</b>           | <b>&lt;0.001</b> | <b>&lt;0.001</b> | -0.34                                       | 0.284        | 0.442        | -0.05                                        | 0.754            | 0.812            |
| Trail-Making B           | <b>-0.48</b>           | <b>&lt;0.001</b> | <b>&lt;0.001</b> | <b>-1.05</b>                                | <b>0.010</b> | <b>0.036</b> | -0.17                                        | 0.442            | 0.619            |
| Digit symbol coding      | <b>-0.44</b>           | <b>&lt;0.001</b> | <b>&lt;0.001</b> | 0.43                                        | 0.274        | 0.442        | -0.05                                        | 0.826            | 0.826            |
| CVLT recall              | <b>-0.48</b>           | <b>&lt;0.001</b> | <b>&lt;0.001</b> | -0.20                                       | 0.671        | 0.782        | <b>1.71</b>                                  | <b>&lt;0.001</b> | <b>&lt;0.001</b> |
| CVLT recognition         | <b>-0.31</b>           | <b>&lt;0.001</b> | <b>&lt;0.001</b> | 0.33                                        | 0.478        | 0.608        | 0.34                                         | 0.185            | 0.324            |
| Span forward             | <b>-0.36</b>           | <b>0.002</b>     | <b>0.002</b>     | <b>1.88</b>                                 | <b>0.005</b> | <b>0.036</b> | <b>0.91</b>                                  | <b>0.012</b>     | 0.058            |
| Span backward            | <b>-0.40</b>           | <b>&lt;0.001</b> | <b>&lt;0.001</b> | <b>1.21</b>                                 | <b>0.010</b> | <b>0.036</b> | <b>0.58</b>                                  | <b>0.023</b>     | 0.066            |
| Letter number sequencing | <b>-0.73</b>           | <b>&lt;0.001</b> | <b>&lt;0.001</b> | <b>-1.38</b>                                | <b>0.006</b> | <b>0.036</b> | -0.14                                        | 0.597            | 0.696            |

Bolded estimates signify statistical significance ( $p < 0.05$ )

WTAR = Wechsler Test of Adult Reading; CVLT = California Verbal Learning Test

<sup>FDR</sup> Corrected for multiple testing (FDR = 0.05)

**Table S12** Group and group-by-age interaction effects of regression analyses adjusting for sex and employment in past year

| Cognitive measure        | Affective psychosis    |                  |                  |                                             |                  |              |                                              |                  |                  |
|--------------------------|------------------------|------------------|------------------|---------------------------------------------|------------------|--------------|----------------------------------------------|------------------|------------------|
|                          | Group effect           |                  |                  | Group-by-age interaction<br>Early adulthood |                  |              | Group-by-age interaction<br>Middle adulthood |                  |                  |
|                          | $\beta$                | $p$              | $p^{FDR}$        | $\beta$                                     | $p$              | $p^{FDR}$    | $\beta$                                      | $p$              | $p^{FDR}$        |
| g                        | <b>-0.32</b>           | <b>&lt;0.001</b> | <b>&lt;0.001</b> | 0.04                                        | 0.908            | 0.921        | 0.20                                         | 0.297            | 0.378            |
| WTAR                     | -0.07                  | 0.305            | 0.427            | -0.04                                       | 0.921            | 0.921        | <b>0.68</b>                                  | <b>0.005</b>     | <b>0.017</b>     |
| Vocabulary               | -0.02                  | 0.735            | 0.857            | <b>-1.11</b>                                | <b>0.006</b>     | <b>0.029</b> | <b>0.47</b>                                  | <b>0.034</b>     | 0.079            |
| Matrix reasoning         | -0.01                  | 0.908            | 0.908            | <b>1.50</b>                                 | <b>0.004</b>     | <b>0.026</b> | 0.43                                         | 0.119            | 0.208            |
| Semantic fluency         | <b>-0.37</b>           | <b>&lt;0.001</b> | <b>&lt;0.001</b> | 0.30                                        | 0.500            | 0.636        | <b>1.07</b>                                  | <b>&lt;0.001</b> | <b>&lt;0.001</b> |
| Verbal fluency           | -0.01                  | 0.868            | 0.908            | -0.52                                       | 0.131            | 0.305        | -0.25                                        | 0.185            | 0.288            |
| Trail-Making A           | <b>-0.21</b>           | <b>&lt;0.001</b> | <b>0.001</b>     | <b>-0.71</b>                                | <b>0.046</b>     | 0.162        | -0.04                                        | 0.824            | 0.824            |
| Trail-Making B           | <b>-0.23</b>           | <b>0.001</b>     | <b>0.002</b>     | -0.50                                       | 0.201            | 0.402        | -0.09                                        | 0.675            | 0.726            |
| Digit symbol coding      | <b>-0.33</b>           | <b>&lt;0.001</b> | <b>&lt;0.001</b> | 0.47                                        | 0.131            | 0.305        | <b>0.58</b>                                  | <b>0.001</b>     | <b>0.007</b>     |
| CVLT recall              | <b>-0.37</b>           | <b>&lt;0.001</b> | <b>&lt;0.001</b> | <b>1.06</b>                                 | <b>0.001</b>     | <b>0.017</b> | <b>0.49</b>                                  | <b>0.006</b>     | <b>0.017</b>     |
| CVLT recognition         | <b>-0.16</b>           | <b>0.048</b>     | 0.075            | 0.53                                        | 0.275            | 0.469        | <b>0.52</b>                                  | <b>0.054</b>     | 0.108            |
| Span forward             | -0.06                  | 0.550            | 0.700            | 0.62                                        | 0.312            | 0.469        | -0.40                                        | 0.234            | 0.327            |
| Span backward            | <b>0.18</b>            | <b>0.006</b>     | <b>0.010</b>     | 0.12                                        | 0.751            | 0.876        | <b>0.67</b>                                  | <b>0.001</b>     | <b>0.007</b>     |
| Letter number sequencing | <b>-0.29</b>           | <b>0.001</b>     | <b>0.002</b>     | -0.51                                       | 0.335            | 0.469        | -0.13                                        | 0.649            | 0.726            |
| Cognitive measure        | Nonaffective psychosis |                  |                  |                                             |                  |              |                                              |                  |                  |
|                          | Group effect           |                  |                  | Group-by-age interaction<br>Early adulthood |                  |              | Group-by-age interaction<br>Middle adulthood |                  |                  |
|                          | $\beta$                | $p$              | $p^{FDR}$        | $\beta$                                     | $p$              | $p^{FDR}$    | $\beta$                                      | $p$              | $p^{FDR}$        |
| g                        | <b>-0.48</b>           | <b>&lt;0.001</b> | <b>&lt;0.001</b> | <b>-1.17</b>                                | <b>0.001</b>     | <b>0.007</b> | 0.32                                         | 0.091            | 0.227            |
| WTAR                     | <b>-0.20</b>           | <b>0.007</b>     | <b>0.009</b>     | -0.24                                       | 0.579            | 0.737        | 0.25                                         | 0.287            | 0.447            |
| Vocabulary               | -0.01                  | 0.886            | 0.886            | 0.75                                        | 0.062            | 0.161        | <b>0.72</b>                                  | <b>0.001</b>     | <b>0.009</b>     |
| Matrix reasoning         | -0.05                  | 0.570            | 0.614            | 0.06                                        | 0.901            | 0.961        | -0.21                                        | 0.453            | 0.634            |
| Semantic fluency         | <b>-0.33</b>           | <b>&lt;0.001</b> | <b>&lt;0.001</b> | -0.02                                       | 0.961            | 0.961        | <b>0.66</b>                                  | <b>0.007</b>     | <b>0.032</b>     |
| Verbal fluency           | <b>-0.20</b>           | <b>0.001</b>     | <b>0.001</b>     | <b>-0.72</b>                                | <b>0.038</b>     | 0.132        | 0.06                                         | 0.732            | 0.854            |
| Trail-Making A           | <b>-0.32</b>           | <b>&lt;0.001</b> | <b>&lt;0.001</b> | -0.61                                       | 0.087            | 0.174        | 0.00                                         | 0.989            | 0.999            |
| Trail-Making B           | <b>-0.42</b>           | <b>&lt;0.001</b> | <b>&lt;0.001</b> | <b>-1.61</b>                                | <b>&lt;0.001</b> | <b>0.001</b> | 0.00                                         | 0.999            | 0.999            |
| Digit symbol coding      | <b>-0.39</b>           | <b>&lt;0.001</b> | <b>&lt;0.001</b> | 0.19                                        | 0.544            | 0.737        | 0.28                                         | 0.097            | 0.227            |
| CVLT recall              | <b>-0.35</b>           | <b>&lt;0.001</b> | <b>&lt;0.001</b> | -0.43                                       | 0.182            | 0.318        | <b>1.17</b>                                  | <b>&lt;0.001</b> | <b>&lt;0.001</b> |
| CVLT recognition         | <b>-0.17</b>           | <b>0.031</b>     | <b>0.036</b>     | 0.42                                        | 0.390            | 0.607        | 0.32                                         | 0.234            | 0.410            |
| Span forward             | <b>-0.38</b>           | <b>0.001</b>     | <b>0.001</b>     | 1.12                                        | 0.069            | 0.161        | <b>0.88</b>                                  | <b>0.009</b>     | <b>0.032</b>     |
| Span backward            | <b>-0.18</b>           | <b>0.005</b>     | <b>0.006</b>     | 0.18                                        | 0.634            | 0.739        | 0.26                                         | 0.216            | 0.410            |
| Letter number sequencing | <b>-0.35</b>           | <b>&lt;0.001</b> | <b>&lt;0.001</b> | <b>-1.34</b>                                | <b>0.012</b>     | 0.057        | -0.19                                        | 0.512            | 0.652            |

Bolded estimates signify statistical significance ( $p < 0.05$ )

WTAR = Wechsler Test of Adult Reading; CVLT = California Verbal Learning Test

<sup>FDR</sup> Corrected for multiple testing (FDR = 0.05)

**Table S13** Group and group-by-age interaction effects of regression analyses adjusting for sex and GAF score

| Cognitive measure        | Affective psychosis |              |              |                                             |              |              |                                              |                  |                  |
|--------------------------|---------------------|--------------|--------------|---------------------------------------------|--------------|--------------|----------------------------------------------|------------------|------------------|
|                          | Group effect        |              |              | Group-by-age interaction<br>Early adulthood |              |              | Group-by-age interaction<br>Middle adulthood |                  |                  |
|                          | $\beta$             | $p$          | $p^{FDR}$    | $\beta$                                     | $p$          | $p^{FDR}$    | $\beta$                                      | $p$              | $p^{FDR}$        |
| g                        | 0.00                | 0.938        | 0.938        | 0.29                                        | 0.382        | 0.594        | <b>0.61</b>                                  | <b>0.001</b>     | <b>0.004</b>     |
| WTAR                     | 0.10                | 0.161        | 0.322        | 0.56                                        | 0.187        | 0.385        | <b>0.63</b>                                  | <b>0.007</b>     | <b>0.021</b>     |
| Vocabulary               | 0.13                | 0.073        | 0.204        | <b>-0.94</b>                                | <b>0.021</b> | 0.146        | 0.47                                         | 0.033            | 0.076            |
| Matrix reasoning         | 0.07                | 0.419        | 0.627        | 0.87                                        | 0.116        | 0.385        | 0.39                                         | 0.199            | 0.279            |
| Semantic fluency         | <b>-0.18</b>        | <b>0.032</b> | 0.110        | 0.25                                        | 0.607        | 0.742        | <b>1.25</b>                                  | <b>&lt;0.001</b> | <b>&lt;0.001</b> |
| Verbal fluency           | <b>0.15</b>         | <b>0.004</b> | <b>0.025</b> | -0.30                                       | 0.338        | 0.591        | -0.23                                        | 0.184            | 0.279            |
| Trail-Making A           | -0.04               | 0.448        | 0.627        | -0.59                                       | 0.095        | 0.385        | -0.08                                        | 0.660            | 0.754            |
| Trail-Making B           | 0.01                | 0.901        | 0.938        | -0.16                                       | 0.691        | 0.744        | 0.05                                         | 0.840            | 0.840            |
| Digit symbol coding      | 0.02                | 0.635        | 0.809        | -0.04                                       | 0.875        | 0.875        | <b>0.51</b>                                  | <b>0.001</b>     | <b>0.004</b>     |
| CVLT recall              | -0.10               | 0.154        | 0.322        | <b>1.22</b>                                 | <b>0.001</b> | <b>0.008</b> | <b>0.73</b>                                  | <b>&lt;0.001</b> | <b>0.001</b>     |
| CVLT recognition         | -0.02               | 0.788        | 0.919        | 0.66                                        | 0.176        | 0.385        | 0.35                                         | 0.187            | 0.279            |
| Span forward             | 0.09                | 0.393        | 0.627        | 0.35                                        | 0.563        | 0.742        | -0.26                                        | 0.441            | 0.561            |
| Span backward            | <b>0.22</b>         | <b>0.001</b> | <b>0.015</b> | -0.52                                       | 0.193        | 0.385        | 0.42                                         | 0.059            | 0.118            |
| Letter number sequencing | <b>-0.22</b>        | <b>0.020</b> | 0.094        | 0.28                                        | 0.636        | 0.742        | 0.12                                         | 0.701            | 0.754            |

  

| Cognitive measure        | Nonaffective psychosis |              |              |                                             |                  |              |                                              |                  |                  |
|--------------------------|------------------------|--------------|--------------|---------------------------------------------|------------------|--------------|----------------------------------------------|------------------|------------------|
|                          | Group effect           |              |              | Group-by-age interaction<br>Early adulthood |                  |              | Group-by-age interaction<br>Middle adulthood |                  |                  |
|                          | $\beta$                | $p$          | $p^{FDR}$    | $\beta$                                     | $p$              | $p^{FDR}$    | $\beta$                                      | $p$              | $p^{FDR}$        |
| g                        | <b>-0.20</b>           | <b>0.001</b> | <b>0.011</b> | -0.63                                       | 0.062            | 0.228        | <b>0.56</b>                                  | <b>0.003</b>     | <b>0.011</b>     |
| WTAR                     | -0.05                  | 0.480        | 0.611        | -0.03                                       | 0.941            | 0.990        | 0.17                                         | 0.472            | 0.660            |
| Vocabulary               | 0.14                   | 0.052        | 0.097        | 0.56                                        | 0.164            | 0.382        | <b>0.66</b>                                  | <b>0.003</b>     | <b>0.011</b>     |
| Matrix reasoning         | 0.03                   | 0.728        | 0.790        | -0.24                                       | 0.658            | 0.837        | -0.28                                        | 0.349            | 0.611            |
| Semantic fluency         | -0.10                  | 0.219        | 0.341        | -0.01                                       | 0.990            | 0.990        | 0.49                                         | 0.064            | 0.178            |
| Verbal fluency           | -0.01                  | 0.777        | 0.790        | -0.62                                       | 0.051            | 0.228        | 0.00                                         | 0.998            | 0.998            |
| Trail-Making A           | <b>-0.14</b>           | <b>0.015</b> | 0.052        | -0.58                                       | 0.100            | 0.279        | -0.22                                        | 0.254            | 0.508            |
| Trail-Making B           | <b>-0.19</b>           | <b>0.011</b> | <b>0.049</b> | <b>-1.72</b>                                | <b>&lt;0.001</b> | <b>0.001</b> | 0.04                                         | 0.849            | 0.914            |
| Digit symbol coding      | <b>-0.14</b>           | <b>0.003</b> | <b>0.023</b> | 0.32                                        | 0.244            | 0.427        | 0.23                                         | 0.123            | 0.287            |
| CVLT recall              | -0.06                  | 0.368        | 0.515        | -0.08                                       | 0.814            | 0.949        | <b>1.03</b>                                  | <b>&lt;0.001</b> | <b>&lt;0.001</b> |
| CVLT recognition         | -0.02                  | 0.790        | 0.790        | 0.59                                        | 0.225            | 0.427        | 0.21                                         | 0.432            | 0.660            |
| Span forward             | <b>-0.22</b>           | <b>0.043</b> | 0.097        | 1.13                                        | 0.065            | 0.228        | <b>1.06</b>                                  | <b>0.002</b>     | <b>0.011</b>     |
| Span backward            | <b>-0.15</b>           | <b>0.025</b> | 0.071        | 0.18                                        | 0.646            | 0.837        | -0.06                                        | 0.792            | 0.914            |
| Letter number sequencing | -0.18                  | 0.056        | 0.097        | -0.53                                       | 0.374            | 0.581        | -0.18                                        | 0.567            | 0.722            |

Bolded estimates signify statistical significance ( $p < 0.05$ )

GAF = Global Assessment of Functioning; WTAR = Wechsler Test of Adult Reading; CVLT = California Verbal Learning Test

<sup>FDR</sup> Corrected for multiple testing (FDR = 0.05)



**Table S14** Group and group-by-age interaction effects of regression analyses adjusting for sex and social functioning

| Cognitive measure        | Affective psychosis    |                  |                  |                                             |                  |              |                                              |                  |                  |
|--------------------------|------------------------|------------------|------------------|---------------------------------------------|------------------|--------------|----------------------------------------------|------------------|------------------|
|                          | Group effect           |                  |                  | Group-by-age interaction<br>Early adulthood |                  |              | Group-by-age interaction<br>Middle adulthood |                  |                  |
|                          | $\beta$                | $p$              | $p^{FDR}$        | $\beta$                                     | $p$              | $p^{FDR}$    | $\beta$                                      | $p$              | $p^{FDR}$        |
| g                        | <b>-0.31</b>           | <b>&lt;0.001</b> | <b>&lt;0.001</b> | 0.30                                        | 0.367            | 0.429        | <b>0.47</b>                                  | <b>0.011</b>     | <b>0.031</b>     |
| WTAR                     | -0.08                  | 0.262            | 0.306            | 0.50                                        | 0.194            | 0.283        | <b>0.80</b>                                  | <b>&lt;0.001</b> | <b>0.001</b>     |
| Vocabulary               | <b>-0.20</b>           | <b>0.009</b>     | <b>0.015</b>     | <b>-0.98</b>                                | <b>0.023</b>     | 0.064        | 0.51                                         | 0.031            | 0.062            |
| Matrix reasoning         | -0.08                  | 0.383            | 0.383            | <b>1.48</b>                                 | <b>0.005</b>     | <b>0.023</b> | 0.58                                         | 0.043            | 0.075            |
| Semantic fluency         | <b>-0.40</b>           | <b>&lt;0.001</b> | <b>&lt;0.001</b> | 0.70                                        | 0.124            | 0.227        | <b>0.99</b>                                  | <b>&lt;0.001</b> | <b>0.001</b>     |
| Verbal fluency           | -0.07                  | 0.219            | 0.279            | 0.03                                        | 0.939            | 0.939        | <b>-0.45</b>                                 | <b>0.023</b>     | 0.054            |
| Trail-Making A           | <b>-0.24</b>           | <b>&lt;0.001</b> | <b>&lt;0.001</b> | -0.52                                       | 0.130            | 0.227        | 0.16                                         | 0.391            | 0.498            |
| Trail-Making B           | <b>-0.18</b>           | <b>0.010</b>     | <b>0.016</b>     | 0.48                                        | 0.239            | 0.304        | 0.04                                         | 0.872            | 0.872            |
| Digit symbol coding      | <b>-0.26</b>           | <b>&lt;0.001</b> | <b>&lt;0.001</b> | <b>1.23</b>                                 | <b>&lt;0.001</b> | <b>0.001</b> | <b>0.49</b>                                  | <b>0.004</b>     | <b>0.014</b>     |
| CVLT recall              | <b>-0.44</b>           | <b>&lt;0.001</b> | <b>&lt;0.001</b> | <b>1.35</b>                                 | <b>&lt;0.001</b> | <b>0.001</b> | <b>0.85</b>                                  | <b>&lt;0.001</b> | <b>&lt;0.001</b> |
| CVLT recognition         | <b>-0.22</b>           | <b>0.003</b>     | <b>0.006</b>     | <b>1.11</b>                                 | <b>0.012</b>     | <b>0.043</b> | 0.32                                         | 0.173            | 0.242            |
| Span forward             | -0.14                  | 0.195            | 0.272            | 0.96                                        | 0.114            | 0.227        | -0.19                                        | 0.566            | 0.610            |
| Span backward            | 0.06                   | 0.315            | 0.339            | 0.09                                        | 0.820            | 0.883        | 0.38                                         | 0.076            | 0.118            |
| Letter number sequencing | <b>-0.39</b>           | <b>&lt;0.001</b> | <b>&lt;0.001</b> | 0.71                                        | 0.202            | 0.283        | 0.20                                         | 0.512            | 0.597            |
| Cognitive measure        | Nonaffective psychosis |                  |                  |                                             |                  |              |                                              |                  |                  |
|                          | Group effect           |                  |                  | Group-by-age interaction<br>Early adulthood |                  |              | Group-by-age interaction<br>Middle adulthood |                  |                  |
|                          | $\beta$                | $p$              | $p^{FDR}$        | $\beta$                                     | $p$              | $p^{FDR}$    | $\beta$                                      | $p$              | $p^{FDR}$        |
| g                        | <b>-0.73</b>           | <b>&lt;0.001</b> | <b>&lt;0.001</b> | <b>-0.72</b>                                | <b>0.033</b>     | 0.154        | <b>0.75</b>                                  | <b>&lt;0.001</b> | <b>0.001</b>     |
| WTAR                     | <b>-0.35</b>           | <b>&lt;0.001</b> | <b>&lt;0.001</b> | 0.06                                        | 0.884            | 0.951        | 0.14                                         | 0.495            | 0.630            |
| Vocabulary               | <b>-0.22</b>           | <b>0.004</b>     | <b>0.005</b>     | 0.72                                        | 0.094            | 0.289        | <b>0.73</b>                                  | <b>0.002</b>     | <b>0.007</b>     |
| Matrix reasoning         | <b>-0.24</b>           | <b>0.008</b>     | <b>0.008</b>     | 0.01                                        | 0.990            | 0.990        | -0.13                                        | 0.635            | 0.720            |
| Semantic fluency         | <b>-0.39</b>           | <b>&lt;0.001</b> | <b>&lt;0.001</b> | 0.13                                        | 0.769            | 0.897        | 0.45                                         | 0.071            | 0.142            |
| Verbal fluency           | <b>-0.30</b>           | <b>&lt;0.001</b> | <b>&lt;0.001</b> | -0.37                                       | 0.306            | 0.577        | 0.17                                         | 0.383            | 0.536            |
| Trail-Making A           | <b>-0.54</b>           | <b>&lt;0.001</b> | <b>&lt;0.001</b> | -0.52                                       | 0.128            | 0.299        | -0.08                                        | 0.668            | 0.720            |
| Trail-Making B           | <b>-0.52</b>           | <b>&lt;0.001</b> | <b>&lt;0.001</b> | <b>-1.07</b>                                | <b>0.010</b>     | 0.141        | 0.07                                         | 0.739            | 0.739            |
| Digit symbol coding      | <b>-0.54</b>           | <b>&lt;0.001</b> | <b>&lt;0.001</b> | 0.27                                        | 0.363            | 0.577        | 0.33                                         | 0.049            | 0.138            |
| CVLT recall              | <b>-0.38</b>           | <b>&lt;0.001</b> | <b>&lt;0.001</b> | 0.26                                        | 0.454            | 0.577        | <b>1.49</b>                                  | <b>&lt;0.001</b> | <b>&lt;0.001</b> |
| CVLT recognition         | <b>-0.27</b>           | <b>&lt;0.001</b> | <b>&lt;0.001</b> | 0.71                                        | 0.103            | 0.289        | 0.45                                         | 0.062            | 0.142            |
| Span forward             | <b>-0.53</b>           | <b>&lt;0.001</b> | <b>&lt;0.001</b> | <b>1.38</b>                                 | <b>0.023</b>     | 0.154        | <b>1.11</b>                                  | <b>0.001</b>     | <b>0.005</b>     |
| Span backward            | <b>-0.40</b>           | <b>&lt;0.001</b> | <b>&lt;0.001</b> | 0.32                                        | 0.418            | 0.577        | 0.22                                         | 0.314            | 0.489            |
| Letter number sequencing | <b>-0.44</b>           | <b>&lt;0.001</b> | <b>&lt;0.001</b> | -0.42                                       | 0.445            | 0.577        | 0.33                                         | 0.281            | 0.489            |

Bolded estimates signify statistical significance ( $p < 0.05$ )

WTAR = Wechsler Test of Adult Reading; CVLT = California Verbal Learning Test

<sup>FDR</sup> Corrected for multiple testing (FDR = 0.05)

Figure S4 Scatter plot of age and duration of psychosis with fitted regression line

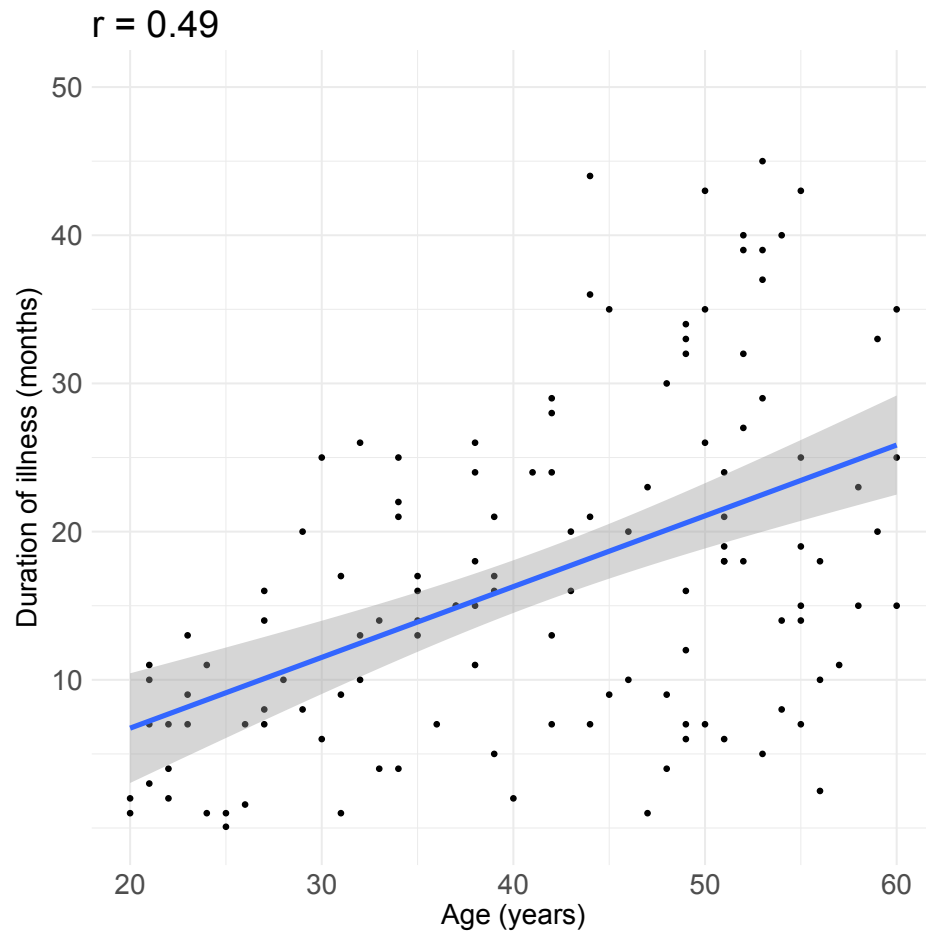

Supplement: NIHMS1574998-supplement-Supplement.pdf [file NIHMS1574998-supplement-Supplement.pdf]
